# Supplementary material
Source: publisher site journal article supplement (https://www.dovepress.com/get_supplementary_file.php?f=265619.docx)
Supplement: Supplementary file 1 [file get_supplementary_file.php]

**Supplemental Digital Content**

Validity of acute cardiovascular outcome diagnoses recorded in European electronic health records: a systematic review

Jennifer A. Davidson1; Amitava Banerjee2; Rutendo Muzambi1; Liam Smeeth1; Charlotte Warren-Gash1

1 Faculty of Epidemiology & Population Health, London School of Hygiene and Tropical Medicine, London, UK

2 Faculty of Population Health Sciences, University College London, London, UK

**Contents**

[**S1 Appendix. Search strategy** 3](#_Toc51242331)

[**S2 Appendix. Data items extracted** 13](#_Toc51242332)

[**S3 Appendix. Adaptation of original QUADAS assessment questions to fit this review** 13](#_Toc51242333)

[**S4 Appendix. Grade assessment** 14](#_Toc51242334)

[**S5 Appendix. Additional validation results – time, age and sex** 15](#_Toc51242335)

[**S6 Appendix. Outcome definitions used in included studies** 16](#_Toc51242336)

[**S1 Table. Characteristics of included studies** 18](#_Toc51242337)

[**S2 Table. Study results** 30](#_Toc51242338)

[**S3 Table. QUADAS-2 assessment of studies** 55](#_Toc51242339)

[**S4 Table. Assessment of quality of evidence for outcomes** 61](#_Toc51242340)

[**S1 Fig. Positive predictive value for ischaemic stroke diagnoses** 62](#_Toc51242341)

[**S2 Fig. Positive predictive value for intracerebral haemorrhage diagnoses** 63](#_Toc51242342)

[**S3 Fig. Positive predictive value for subarachnoid haemorrhage diagnoses** 64](#_Toc51242343)

[**S4 Fig. Sensitivity for ischaemic stroke diagnoses** 65](#_Toc51242344)

[**S5 Fig. Sensitivity for intracerebral haemorrhage diagnoses**  66](#_Toc51242345)

[**S6 Fig. Sensitivity for subarachnoid haemorrhage diagnoses** 67](#_Toc51242346)

# **S1 Appendix. Search strategy**

**Medline (OVID)**

1. (Europe or Albania or Andorra or Armenia or Austria or Azerbaijan or Balkan* or Belgium or Belarus or Byelarus or Belorussia or Bosnia or Herzegovia or Bulgaria or Croatia or Cyprus or Czechoslovakia or Czech Republic or Denmark or Faeroe Islands or Estonia or Finland or France or Germany or Great Britain or GBR or United Kingdom or UK or (Wales not New South Wales) or (England not New England) or Northern Ireland or Scotland or Channel Islands or Isle of Man or Greece or Gibraltar or Hungary or Iceland or Ireland or Eire or Italy or Latvia or Liechtenstein or Lithuania or Luxembourg or Kosovo or Macedonia or Malta or Mediterranean or Moldova or Monaco or Montenegro or Netherlands or Holland or Norway or Poland or Portugal or Romania or Russia or Russian Federation or USSR or "Union of Soviet Socialist Republics" or Soviet Union or San Marino or Scandinavia or Serbia or Slovakia or Slovak Republic or Slovenia or Spain or Balearic Islands or Canary Islands or Sweden or Switzerland or Ukraine).ti,ab.
2. turkey.ti,ab. not animal/
3. exp Europe/
4. or/1-3
5. exp Stroke/ or exp Brain Infarction/ or exp Cerebral Hemorrhage/ or exp Subarachnoid Hemorrhage/
6. stroke.ti,ab.
7. cerebrovascular accident.ti,ab.
8. ((brain* or cerebr* or intracerebral or intracran* or subarachnoid) adj (infarct* or thrombo* or emboli* or h?emorrhage or h?ematoma or bleed*)).ti,ab.
9. or/5-8
10. exp Myocardial Infarction/ or Acute Coronary Syndrome/
11. (myocardial infarct* or MI or AMI or acute coronary syndrome or ACS).ti,ab.
12. ((cardiac or heart) adj (infarct* or attack* or arrest* or event*)).ti,ab.
13. (stemi or st-segment or st segment or st-elevat* or st elevat*).ti,ab.
14. (nstemi or non-st-segment or non-st segment or non st segment or non-st-elevat* or non-st elevat* or non st elevat*).ti,ab.
15. or/10-14
16. exp Heart Failure/
17. (heart failure or cardiac failure or CCF or left ventricular failure).ti,ab.
18. (left ventricular adj (systolic or diastolic) adj (dysfunction or impairment)).ti,ab.
19. or/16-18
20. 9 or 15 or 19
21. Hospital Records/ or exp Medical Records/
22. ((electronic* or digital* or computer* or longitudinal) adj (health* or medical or clinical or patient) adj (record* or data* or regist*)).ti,ab.
23. (EHR or EPR or EMR or EPD).ti,ab.
24. (routine* collected adj2 data).ti,ab.
25. ((primary care or general practice or secondary care or hospital* or health* or administrative or automated) adj2 (record* or data* or regist*)).ti,ab.
26. exp Clinical Coding/ or exp International Classification of Diseases/
27. ((clinical or medical or read or OXMIS) adj cod*).ti,ab.
28. SNOMED.ti,ab.
29. (International Classification of Diseases or ICD10* or ICD-10* or ICD9* or ICD-9* or International Classification of Primary Care or ICPC).ti,ab.
30. (Clinical Practice Research Datalink or CPRD or General Practice Research Database or GPRD or Value Added Medical Products or VAMP or Hospital Episode Statistics or HES or The Health Improvement Network or QResearch or ResearchOne or Danish National Patient Registry or DNPR or Intego or National Patient Register or NPR or patientregistret or National Inpatient Register or IPR or slutenvardsregistret or Finnish Hospital Discharge Register or FHDR or BIFAP or DIRAYA or Dutch National Basic Registration of Hospital Care or Landelijke Basisregistratie Ziekenhuiszorg or LBZ or Dutch Hospital Discharge Register or Landelijke Medische registratie or LMR or Mondriaan or Netherlands Primary Care Research Database or NPCRD or Integrated Primary Care Information or IPCI or Information Network of General Practice or LINH or French Hospital Discharge Database or FHDDB or Health Longitudinal Patient Database or HSD).ti,ab.
31. or/21-30
32. Validation Studies/ or exp Reproducibility of Results/ or exp "sensitivity and specificity"/
33. (sensitivity or specificity or positive predictive value or PPV or negative predictive value or NPV).ti,ab.
34. (accura* or consisten* or reliab* or reproduc* or complet* or precis* or concordance or variation or variab* or replicat* or verif* or valid* or predict*).ti,ab.
35. (ROC or receiver operating characteristic or kappa).ti,ab.
36. or/32-35
37. 4 and 20 and 31 and 36

**Embase**

1. (Europe or Albania or Andorra or Armenia or Austria or Azerbaijan or Balkan* or Belgium or Belarus or Byelarus or Belorussia or Bosnia or Herzegovia or Bulgaria or Croatia or Cyprus or Czechoslovakia or Czech Republic or Denmark or Faeroe Islands or Estonia or Finland or France or Germany or Great Britain or GBR or United Kingdom or UK or (Wales not New South Wales) or (England not New England) or Northern Ireland or Scotland or Channel Islands or Isle of Man or Greece or Gibraltar or Hungary or Iceland or Ireland or Eire or Italy or Latvia or Liechtenstein or Lithuania or Luxembourg or Kosovo or Macedonia or Malta or Mediterranean or Moldova or Monaco or Montenegro or Netherlands or Holland or Norway or Poland or Portugal or Romania or Russia or Russian Federation or USSR or "Union of Soviet Socialist Republics" or Soviet Union or San Marino or Scandinavia or Serbia or Slovakia or Slovak Republic or Slovenia or Spain or Balearic Islands or Canary Islands or Sweden or Switzerland or Ukraine).ti,ab.
2. turkey.ti,ab. not animal/
3. exp Europe/
4. or/1-3
5. exp cerebrovascular accident/ or exp brain infarction/ or exp brain hemorrhage/ or exp subarachnoid hemorrhage/ or exp brain hematoma/
6. stroke.ti,ab.
7. cerebrovascular accident.ti,ab.
8. ((brain* or cerebr* or intracerebral or intracran* or subarachnoid) adj (infarct* or thrombo* or emboli* or h?emorrhage or h?ematoma or bleed*)).ti,ab.
9. or/5-8
10. exp heart infarction/ or acute coronary syndrome/
11. (myocardial infarct* or MI or AMI or acute coronary syndrome or ACS).ti,ab.
12. ((cardiac or heart) adj (infarct* or attack* or arrest* or event*)).ti,ab.
13. (stemi or st-segment or st segment or st-elevat* or st elevat*).ti,ab.
14. (nstemi or non-st-segment or non-st segment or non st segment or non-st-elevat* or non-st elevat* or non st elevat*).ti,ab.
15. or/10-14
16. exp heart failure/
17. (heart failure or cardiac failure or CCF or left ventricular failure).ti,ab.
18. (left ventricular adj (systolic or diastolic) adj (dysfunction or impairment)).ti,ab.
19. or/16-18
20. 9 or 15 or 19
21. exp medical record/
22. ((electronic* or digital* or computer* or longitudinal) adj (health* or medical or clinical or patient) adj (record* or data* or regist*)).ti,ab.
23. (EHR or EPR or EMR or EPD).ti,ab.
24. routine* collected adj2 data).ti,ab.
25. ((primary care or general practice or secondary care or hospital* or health* or administrative or automated) adj2 (record* or data* or regist*)).ti,ab.
26. exp Clinical Coding/ or exp International Classification of Diseases/
27. ((clinical or medical or read or OXMIS) adj cod*).ti,ab.
28. SNOMED.ti,ab.
29. (International Classification of Diseases or ICD10* or ICD-10* or ICD9* or ICD-9* or International Classification of Primary Care or ICPC).ti,ab.
30. (Clinical Practice Research Datalink or CPRD or General Practice Research Database or GPRD or Value Added Medical Products or VAMP or Hospital Episode Statistics or HES or The Health Improvement Network or QResearch or ResearchOne or Danish National Patient Registry or DNPR or Intego or National Patient Register or NPR or patientregistret or National Inpatient Register or IPR or slutenvardsregistret or Finnish Hospital Discharge Register or FHDR or BIFAP or DIRAYA or Dutch National Basic Registration of Hospital Care or Landelijke Basisregistratie Ziekenhuiszorg or LBZ or Dutch Hospital Discharge Register or Landelijke Medische registratie or LMR or Mondriaan or Netherlands Primary Care Research Database or NPCRD or Integrated Primary Care Information or IPCI or Information Network of General Practice or LINH or French Hospital Discharge Database or FHDDB or Health Longitudinal Patient Database or HSD).ti,ab.
31. or/21-30
32. exp validation study/ or exp predictive value/ or exp reproducibility/ or exp "sensitivity and specificity"/
33. (sensitivity or specificity or positive predictive value or PPV or negative predictive value or NPV).ti,ab.
34. (accura* or consisten* or reliab* or reproduc* or complet* or precis* or concordance or variation or variab* or replicat* or verif* or valid* or predict*).ti,ab.
35. (ROC or receiver operating characteristic or kappa).ti,ab.
36. or/32-35
37. 4 and 20 and 31 and 36

**Scopus**

( TITLE-ABS KEY ( europe OR albania OR andorra OR armenia OR austria OR azerbaijan OR balkan* OR belgium OR belarus OR byelarus OR belorussia OR bosnia OR herzegovia OR bulgaria OR croatia OR cyprus OR czechoslovakia OR "Czech Republic" OR denmark OR "Faeroe Islands" OR estonia OR finland OR france OR germany OR "Great Britain" OR gbr OR "United Kingdom" OR uk OR "Northern Ireland" OR scotland OR "Channel Islands" OR "Isle of Man" OR greece OR gibraltar OR hungary OR iceland OR ireland OR eire OR italy OR latvia OR liechtenstein OR lithuania OR luxembourg OR kosovo OR macedonia OR malta OR mediterranean OR moldova OR monaco OR montenegro OR netherlands OR holland OR norway OR poland OR portugal OR romania OR russia OR "Russian Federation" OR ussr OR "Union of Soviet Socialist Republics" OR "Soviet Union" OR "San Marino" OR scandinavia OR serbia OR slovakia OR "Slovak Republic" OR slovenia OR spain OR "Balearic Islands" OR "Canary Islands" OR sweden OR switzerland OR turkey OR ukraine ) ) OR ( TITLE-ABS-KEY ( wales AND NOT "New South Wales" ) ) OR ( TITLE-ABS-KEY ( england AND NOT "New England" ) ) AND

( TITLE-ABS-KEY ( stroke OR "cerebrovascular accident" ) ) OR ( TITLE-ABS-KEY ( brain* OR cerebr* OR intracerebral OR intracran* OR subarachnoid PRE/0 infarct* OR thrombo* OR emboli* OR h*emorrhage OR h*ematoma* OR bleed* ) ) OR ( TITLE-ABS-KEY ( "myocardial infarct*" OR mi OR ami OR "acute coronary syndrome" OR acs OR stemi OR "st segment" OR "st elevat*" OR nstemi OR "non st segment" OR "non st elevat*" ) ) OR ( TITLE-ABS-KEY ( cardiac OR heart PRE/0 infarct* OR attack* OR arrest* OR event* ) ) OR ( TITLE-ABS-KEY ( "heart failure" OR "cardiac failure" OR ccf OR "left ventricular failure" ) ) OR ( TITLE-ABS-KEY ( "left ventricular" PRE/0 systolic OR diastolic PRE/0 dysfunction OR impairment ) ) AND

( TITLE-ABS-KEY ( electronic* OR digital* OR computer* OR longitudinal PRE/0 health* OR medical OR clinical OR patient PRE/0 record* OR data* OR regist* ) ) OR ( TITLE-ABS-KEY ( ehr OR epr OR emr OR epd ) ) OR ( TITLE-ABS-KEY ( "routine* collected" PRE/2 data ) ) OR ( TITLE-ABS-KEY ( clinical OR medical OR read OR oxmis PRE/0 cod* ) ) OR ( TITLE-ABS-KEY ( snomed OR {International Classification of Diseases} OR icd10* OR icd-10* OR icd9* OR icd-9* OR {International Classification of Primary Care} OR icpc OR {Clinical Practice Research Datalink} OR cprd OR {General Practice Research Database} OR gprd OR {Value Added Medical Products} OR vamp OR {Hospital Episode Statistics} OR hes OR {The Health Improvement Network} OR qresearch OR researchone OR {Danish National Patient Registry} OR dnpr OR intego OR {National Patient Register} OR npr OR patientregistret OR {National Inpatient Register} OR ipr OR slutenvardsregistret OR {Finnish Hospital Discharge Register} OR fhdr OR bifap OR diraya OR {Dutch National Basic Registration of Hospital Care} OR {Landelijke Basisregistratie Ziekenhuiszorg} OR lbz OR {Dutch Hospital Discharge Register} OR {Landelijke Medische registratie} OR lmr OR mondriaan OR {Netherlands Primary Care Research Database} OR npcrd OR {Integrated Primary Care Information} OR ipci OR {Information Network of General Practice} OR linh OR {French Hospital Discharge Database} OR fhddb OR {Health Longitudinal Patient Database} OR hsd )) AND

( TITLE-ABS-KEY ( sensitivity OR specificity OR "positive predictive value" OR ppv OR "negative predictive value" OR npv OR accura* OR consisten* OR reliab* OR reproduc* OR complet* OR precis* OR concordance OR variation OR variab* OR replicat* OR verif* OR valid* OR predict* OR roc OR "receiver operating characteristic" OR kappa ) )

**Web of Science**

1. TS=(Europe or Albania or Andorra or Armenia or Austria or Azerbaijan or Balkan* or Belgium or Belarus or Byelarus or Belorussia or Bosnia or Herzegovia or Bulgaria or Croatia or Cyprus or Czechoslovakia or "Czech Republic" or Denmark or "Faeroe Islands" or Estonia or Finland or France or Germany or "Great Britain" or GBR or "United Kingdom" or UK or "Northern Ireland" or Scotland or "Channel Islands" or "Isle of Man" or Greece or Gibraltar or Hungary or Iceland or Ireland or Eire or Italy or Latvia or Liechtenstein or Lithuania or Luxembourg or Kosovo or Macedonia or Malta or Mediterranean or Moldova or Monaco or Montenegro or Netherlands or Holland or Norway or Poland or Portugal or Romania or Russia or "Russian Federation" or USSR or "Union of Soviet Socialist Republics" or "Soviet Union" or "San Marino" or Scandinavia or Serbia or Slovakia or "Slovak Republic" or Slovenia or Spain or "Balearic Islands" or "Canary Islands" or Sweden or Switzerland or Turkey or Ukraine)
2. TS=(Wales NOT "New South Wales")
3. TS=(England NOT "New England")
4. #1 or #2 or #3
5. TS=(stroke or "cerebrovascular accident" or "brain* infarct*" or "brain* thrombo*" or "brain* emboli*" or "brain* h?emorrhage" or "brain* h?ematoma" or "brain* bleed*" or "cerebr* infarct*" or "cerebr* thrombo*" or "cerebr* emboli*" or "cerebr* h?emorrhage" or "cerebr* h?ematoma" or "cerebr* bleed*" or "intracerebral infarct*" or "intracerebral thrombo*" or "intracerebral emboli*" or "intracerebral h?emorrhage" or "intracerebral h?ematoma" or "intracerebral bleed*" or " intracran* infarct*" or " intracran* thrombo*" or " intracran* emboli*" or " intracran* h?emorrhage" or " intracran* h?ematoma" or " intracran* bleed*")
6. TS=("myocardial infarct*" or mi or ami or "cardiac infarct*" or "cardiac attack*" or "cardiac arrest*" or "cardiac event*" or "heart infarct*" or "heart attack*" or "heart arrest*" or "heart event*" or stemi or "st-segment" or "st-elevat*" or nstemi or "non-st-segment" or "non-st-elevat*" or "acute coronary syndrome" or ACS)
7. TS=("heart failure" or "cardiac failure" or CCF or "left ventricular failure" or "left ventricular systolic dysfunction" or "left ventricular systolic impairment" or "left ventricular diastolic dysfunction" or "left ventricular diastolic impairment")
8. #5 or #6 or #7
9. TS=("electronic* health* record*" or "electronic* health* data*" or "electronic* health* regist*" or "digital* health* record*" or "digital* health* data*" or "digital* health* regist*" or "computer* health* record*" or "computer* health* data*" or "computer* health* regist*" or "longitudinal health* record*" or "longitudinal health* data*" or "longitudinal health* regist*" or "electronic* medical record*" or "electronic* medical data*" or "electronic* medical regist*" or "digital* medical record*" or "digital* medical data*" or "digital* medical regist*" or "computer* medical record*" or "computer* medical data*" or "computer* medical regist*" or "longitudinal medical record*" or "longitudinal medical data*" or "longitudinal medical regist*" or "electronic* clinical record*" or "electronic* clinical data*" or "electronic* clinical regist*" or "digital* clinical record*" or "digital* clinical data*" or "digital* clinical regist*" or "computer* clinical record*" or "computer* clinical data*" or "computer* clinical regist*" or "longitudinal clinical record*" or "longitudinal clinical data*" or "longitudinal clinical regist*" or EHR or EPR or EMR or EPD)
10. TS=("routine* collected" NEAR/2 data or "primary care" NEAR/2 record* or "general practice" NEAR/2 record* or "secondary care" NEAR/2 record* or hospital* NEAR/2 record* or health* NEAR/2 record* or administrative NEAR/2 record* or automated NEAR/2 record* or "primary care" NEAR/2 data* or "general practice" NEAR/2 data* or "secondary care" NEAR/2 data* or hospital* NEAR/2 data* or health* NEAR/2 data* or administrative NEAR/2 data* or automated NEAR/2 data* or "primary care" NEAR/2 regist* or "general practice" NEAR/2 regist* or "secondary care" NEAR/2 regist* or hospital* NEAR/2 regist* or health* NEAR/2 regist* or administrative NEAR/2 regist* or automated NEAR/2 regist*)
11. TS=("clinical cod*" or "medical cod*" or "read cod*" or "oxmis cod*" or SNOMED or "International Classification of Diseases" or ICD-10* or ICD-9* or "International Classification of Primary Care" or ICPC)
12. TS=("Clinical Practice Research Datalink" or CPRD or "General Practice Research Database" or GPRD or "Value Added Medical Products" or VAMP or "Hospital Episode Statistics" or HES or "The Health Improvement Network" or QResearch or ResearchOne or "Danish National Patient Registry" or DNPR or Intego or "National Patient Register" or NPR or patientregistret or "National Inpatient Register" or IPR or slutenvardsregistret or "Finnish Hospital Discharge Register" or FHDR or BIFAP or DIRAYA or "Dutch National Basic Registration of Hospital Care" or "Landelijke Basisregistratie Ziekenhuiszorg" or LBZ or "Dutch Hospital Discharge Register" or "Landelijke Medische registratie" or LMR or Mondriaan or "Netherlands Primary Care Research Database" or NPCRD or "Integrated Primary Care Information" or IPCI or "Information Network of General Practice" or LINH or "French Hospital Discharge Database" or FHDDB or "Health Longitudinal Patient Database" or HSD)
13. #9 or #10 or #11 or #12
14. TS=(sensitivity or specificity or "positive predictive value" or PPV or "negative predictive value" or NPV or accura* or consisten* or reliab* or reproduc* or complet* or precis* or concordance or variation or variab* replicat* or verif* or valid* or predict* or ROC or "receiver operating characteristic" or kappa)
15. #4 and #8 and #13 and #14

**Cochrane Library**

1. MeSH descriptor: [Europe] explode all trees
2. (Europe or Albania or Andorra or Armenia or Austria or Azerbaijan or Balkan* or Belgium or Belarus or Byelarus or Belorussia or Bosnia or Herzegovia or Bulgaria or Croatia or Cyprus or Czechoslovakia or Czech Republic or Denmark or Faeroe Islands or Estonia or Finland or France or Germany or Great Britain or GBR or United Kingdom or UK or Wales or England or Northern Ireland or Scotland or Channel Islands or Isle of Man or Greece or Gibraltar or Hungary or Iceland or Ireland or Eire or Italy or Latvia or Liechtenstein or Lithuania or Luxembourg or Kosovo or Macedonia or Malta or Mediterranean or Moldova or Monaco or Montenegro or Netherlands or Holland or Norway or Poland or Portugal or Romania or Russia or Russian Federation or USSR or "Union of Soviet Socialist Republics" or Soviet Union or San Marino or Scandinavia or Serbia or Slovakia or Slovak Republic or Slovenia or Spain or Balearic Islands or Canary Islands or Sweden or Switzerland or Turkey or Ukraine):ti,ab,kw
3. #1 or #2
4. MeSH descriptor: [Stroke] explode all trees
5. MeSH descriptor: [Brain Infarction] explode all trees
6. MeSH descriptor: [Cerebral Hemorrhage] explode all trees
7. MeSH descriptor: [Subarachnoid Hemorrhage] explode all trees
8. (stroke or "cerebrovascular accident" or "brain* infarct*" or "brain* thrombo*" or "brain* emboli*" or "brain* h?emorrhage" or "brain* h?ematoma" or "brain* bleed*" or "cerebr* infarct*" or "cerebr* thrombo*" or "cerebr* emboli*" or "cerebr* h?emorrhage" or "cerebr* h?ematoma" or "cerebr* bleed*" or "intracerebral infarct*" or "intracerebral thrombo*" or "intracerebral emboli*" or "intracerebral h?emorrhage" or "intracerebral h?ematoma" or "intracerebral bleed*" or " intracran* infarct*" or " intracran* thrombo*" or " intracran* emboli*" or " intracran* h?emorrhage" or " intracran* h?ematoma" or " intracran* bleed*"):ti,ab,kw
9. MeSH descriptor: [Acute Coronary Syndrome] explode all trees
10. MeSH descriptor: [Myocardial Infarction] explode all trees
11. ("myocardial infarct*" or mi or ami or "cardiac infarct*" or "cardiac attack*" or "cardiac arrest*" or "cardiac event*" or "heart infarct*" or "heart attack*" or "heart arrest*" or "heart event*" or stemi or "st-segment" or "st segment" or "st-elevat*" or "st elevat*" or nstemi or "non-st-segment" or "non-st segment" or "non st segment" or "non-st-elevat*" or "non-st elevat*" or "non st elevat*" or "acute coronary syndrome" or ACS):ti,ab,kw
12. MeSH descriptor: [Heart Failure] explode all trees
13. ("heart failure" or "cardiac failure" or CCF or "left ventricular failure" or "left ventricular systolic dysfunction" or "left ventricular systolic impairment" or "left ventricular diastolic dysfunction" or "left ventricular diastolic impairment"):ti,ab,kw
14. #4 or #5 or #6 or #7 or #8 or #9 or #10 or #11 or #12 or #13
15. MeSH descriptor: [Hospital Records] explode all trees
16. MeSH descriptor: [Medical Records] explode all trees
17. ("electronic* health* record*" or "electronic* health* data*" or "electronic* health* regist*" or "digital* health* record*" or "digital* health* data*" or "digital* health* regist*" or "computer* health* record*" or "computer* health* data*" or "computer* health* regist*" or "longitudinal health* record*" or "longitudinal health* data*" or "longitudinal health* regist*" or "electronic* medical record*" or "electronic* medical data*" or "electronic* medical regist*" or "digital* medical record*" or "digital* medical data*" or "digital* medical regist*" or "computer* medical record*" or "computer* medical data*" or "computer* medical regist*" or "longitudinal medical record*" or "longitudinal medical data*" or "longitudinal medical regist*" or "electronic* clinical record*" or "electronic* clinical data*" or "electronic* clinical regist*" or "digital* clinical record*" or "digital* clinical data*" or "digital* clinical regist*" or "computer* clinical record*" or "computer* clinical data*" or "computer* clinical regist*" or "longitudinal clinical record*" or "longitudinal clinical data*" or "longitudinal clinical regist*" or EHR or EPR or EMR or EPD):ti,ab,kw
18. ("routine* collected" NEAR/2 data or "primary care" NEAR/2 record* or "general practice" NEAR/2 record* or "secondary care" NEAR/2 record* or hospital* NEAR/2 record* or health* NEAR/2 record* or administrative NEAR/2 record* or automated NEAR/2 record* or "primary care" NEAR/2 data* or "general practice" NEAR/2 data* or "secondary care" NEAR/2 data* or hospital* NEAR/2 data* or health* NEAR/2 data* or administrative NEAR/2 data* or automated NEAR/2 data* or "primary care" NEAR/2 regist* or "general practice" NEAR/2 regist* or "secondary care" NEAR/2 regist* or hospital* NEAR/2 regist* or health* NEAR/2 regist* or administrative NEAR/2 regist* or automated NEAR/2 regist*):ti,ab,kw
19. ("clinical cod*" or "medical cod*" or "read cod*" or "oxmis cod*" or SNOMED or "International Classification of Diseases" or ICD-10* or ICD-9* or "International Classification of Primary Care" or ICPC):ti,ab,kw
20. ("Clinical Practice Research Datalink" or CPRD or "General Practice Research Database" or GPRD or "Value Added Medical Products" or VAMP or "Hospital Episode Statistics" or HES or "The Health Improvement Network" or QResearch or ResearchOne or "Danish National Patient Registry" or DNPR or Intego or "National Patient Register" or NPR or patientregistret or "National Inpatient Register" or IPR or slutenvardsregistret or "Finnish Hospital Discharge Register" or FHDR or BIFAP or DIRAYA or "Dutch National Basic Registration of Hospital Care" or "Landelijke Basisregistratie Ziekenhuiszorg" or LBZ or "Dutch Hospital Discharge Register" or "Landelijke Medische registratie" or LMR or Mondriaan or "Netherlands Primary Care Research Database" or NPCRD or "Integrated Primary Care Information" or IPCI or "Information Network of General Practice" or LINH or "French Hospital Discharge Database" or FHDDB or "Health Longitudinal Patient Database" or HSD):ti,ab,kw
21. #15 or #16 or #17 or #18 or #19 or #20
22. MeSHdescriptor [Validation Studies] explode all trees
23. MeSH descriptor [Reproducibility of Results] explode all trees
24. MeSH descriptor [Sensitivity and Specificity] explode all trees
25. (sensitivity or specificity or "positive predictive value" or PPV or "negative predictive value" or NPV or accura* or consisten* or reliab* or reproduc* or complet* or precis* or concordance or variation or variab* replicat* or verif* or valid* or predict* or ROC or "receiver operating characteristic" or kappa):ti,ab,kw
26. #22 or #23 or #24 or #25
27. #3 and #14 and #21 and #26

**Open Grey**

1. stroke and electronic* NEAR/2 data* and valid*
2. stroke and "routine* collected" NEAR/2 data* and valid*
3. stroke and "primary care" NEAR/2 data* and valid*
4. stroke and "general practice" NEAR/2 data* and valid*
5. stroke and "secondary care" NEAR/2 data* and valid*
6. stroke and hospital* NEAR/2 data* and valid*
7. stroke and administrative NEAR/2 data* and valid*
8. stroke and electronic* NEAR/2 record* and valid*
9. stroke and "primary care" NEAR/2 record* and valid*
10. stroke and "general practice" NEAR/2 record* and valid*
11. stroke and "secondary care" NEAR/2 record* and valid*
12. stroke and hospital* NEAR/2 record* and valid*
13. stroke and administrative* NEAR/2 record* and valid*
14. stroke and electronic* NEAR/2 data* and complet*
15. stroke and "routine* collected" NEAR/2 data* and complet*
16. stroke and "primary care" NEAR/2 data* and complet*
17. stroke and "general practice" NEAR/2 data* and complet*
18. stroke and "secondary care" NEAR/2 data* and complet*
19. stroke and hospital* NEAR/2 data* and complet*
20. stroke and administrative NEAR/2 data* and complet*
21. stroke and electronic* NEAR/2 record* and complet*
22. stroke and "primary care" NEAR/2 record* and complet*
23. stroke and "general practice" NEAR/2 record* and complet*
24. stroke and "secondary care" NEAR/2 record* and complet*
25. stroke and hospital* NEAR/2 record* and complet*
26. stroke and administrative* NEAR/2 record* and complet*
27. "acute coronary syndrome" and electronic* NEAR/2 data* and valid*
28. "acute coronary syndrome" and "routine* collected" NEAR/2 data* and valid*
29. "acute coronary syndrome" and "primary care" NEAR/2 data* and valid*
30. "acute coronary syndrome" and "general practice" NEAR/2 data* and valid*
31. "acute coronary syndrome" and "secondary care" NEAR/2 data* and valid*
32. "acute coronary syndrome" and hospital* NEAR/2 data* and valid*
33. "acute coronary syndrome" and administrative NEAR/2 data* and valid*
34. "acute coronary syndrome" and electronic* NEAR/2 record* and valid*
35. "acute coronary syndrome" and "primary care" NEAR/2 record* and valid*
36. "acute coronary syndrome" and "general practice" NEAR/2 record* and valid*
37. "acute coronary syndrome" and "secondary care" NEAR/2 record* and valid*
38. "acute coronary syndrome" and hospital* NEAR/2 record* and valid*
39. "acute coronary syndrome" and administrative NEAR/2 record* and valid*
40. "acute coronary syndrome" and electronic* NEAR/2 data* and complet*
41. "acute coronary syndrome" and "routine* collected" NEAR/2 data* and complet*
42. "acute coronary syndrome" and "primary care" NEAR/2 data* and complet*
43. "acute coronary syndrome" and "general practice" NEAR/2 data* and complet*
44. "acute coronary syndrome" and "secondary care" NEAR/2 data* and complet*
45. "acute coronary syndrome" and hospital* NEAR/2 data* and complet*
46. "acute coronary syndrome" and administrative NEAR/2 data* and complet*
47. "acute coronary syndrome" and electronic* NEAR/2 record* and complet*
48. "acute coronary syndrome" and "primary care" NEAR/2 record* and complet*
49. "acute coronary syndrome" and "general practice" NEAR/2 record* and complet*
50. "acute coronary syndrome" and "secondary care" NEAR/2 record* and complet*
51. "acute coronary syndrome" and hospital* NEAR/2 record* and complet*
52. "acute coronary syndrome" and administrative NEAR/2 record* and complet*
53. "myocardial infarction" and electronic* NEAR/2 data* and valid*
54. "myocardial infarction" and "routine* collected" NEAR/2 data* and valid*
55. "myocardial infarction" and "primary care" NEAR/2 data* and valid*
56. "myocardial infarction" and "general practice" NEAR/2 data* and valid*
57. "myocardial infarction" and "secondary care" NEAR/2 data* and valid*
58. "myocardial infarction" and hospital* NEAR/2 data* and valid*
59. "myocardial infarction" and administrative NEAR/2 data* and valid*
60. "myocardial infarction" and electronic* NEAR/2 record* and valid*
61. "myocardial infarction" and "primary care" NEAR/2 record* and valid*
62. "myocardial infarction" and "general practice" NEAR/2 record* and valid*
63. "myocardial infarction" and "secondary care" NEAR/2 record* and valid*
64. "myocardial infarction" and hospital* NEAR/2 record* and valid*
65. "myocardial infarction" and administrative NEAR/2 record* and valid*
66. "myocardial infarction" and electronic* NEAR/2 data* and complet*
67. "myocardial infarction" and "routine* collected" NEAR/2 data* and complet*
68. "myocardial infarction" and "primary care" NEAR/2 data* and complet*
69. "myocardial infarction" and "general practice" NEAR/2 data* and complet*
70. "myocardial infarction" and "secondary care" NEAR/2 data* and complet*
71. "myocardial infarction" and hospital* NEAR/2 data* and complet*
72. "myocardial infarction" and administrative NEAR/2 data* and complet*
73. "myocardial infarction" and electronic* NEAR/2 record* and complet*
74. "myocardial infarction" and "primary care" NEAR/2 record* and complet*
75. "myocardial infarction" and "general practice" NEAR/2 record* and complet*
76. "myocardial infarction" and "secondary care" NEAR/2 record* and complet*
77. "myocardial infarction" and hospital* NEAR/2 record* and complet*
78. "myocardial infarction" and administrative NEAR/2 record* and complet*
79. "heart failure" and electronic* NEAR/2 data* and valid*
80. "heart failure" and "routine* collected" NEAR/2 data* and valid*
81. "heart failure" and "primary care" NEAR/2 data* and valid*
82. "heart failure" and "general practice" NEAR/2 data* and valid*
83. "heart failure" and "secondary care" NEAR/2 data* and valid*
84. "heart failure" and hospital* NEAR/2 data* and valid*
85. "heart failure" and administrative NEAR/2 data* and valid*
86. "heart failure" and electronic* NEAR/2 record* and valid*
87. "heart failure" and "primary care" NEAR/2 record* and valid*
88. "heart failure" and "general practice" NEAR/2 record* and valid*
89. "heart failure" and "secondary care" NEAR/2 record* and valid*
90. "heart failure" and hospital* NEAR/2 record* and valid*
91. "heart failure" and administrative* NEAR/2 record* and valid*
92. "heart failure" and electronic* NEAR/2 data* and complet*
93. "heart failure" and "routine* collected" NEAR/2 data* and complet*
94. "heart failure" and "primary care" NEAR/2 data* and complet*
95. "heart failure" and "general practice" NEAR/2 data* and complet*
96. "heart failure" and "secondary care" NEAR/2 data* and complet*
97. "heart failure" and hospital* NEAR/2 data* and complet*
98. "heart failure" and administrative* NEAR/2 data* and complet*
99. "heart failure" and electronic* NEAR/2 record* and complet*
100. "heart failure" and "primary care" NEAR/2 record* and complet*
101. "heart failure" and "general practice" NEAR/2 record* and complet*
102. "heart failure" and "secondary care" NEAR/2 record* and complet*
103. "heart failure" and hospital* NEAR/2 record* and complet*
104. "heart failure" and administrative* NEAR/2 record* and complet*

**EThOS**

1. stroke and "electronic* health* data*" and valid*
2. stroke and "routine* collected data*" and valid*
3. stroke and "primary care data*" and valid*
4. stroke and "general practice data*" and valid*
5. stroke and "secondary care data*" and valid*
6. stroke and "hospital* data*" and valid*
7. stroke and "administrative health* data*" and valid*
8. stroke and "electronic* health* record*" and valid*
9. stroke and "primary care record*" and valid*
10. stroke and "general practice record*" and valid*
11. stroke and "secondary care record*" and valid*
12. stroke and "hospital* record*" and valid*
13. stroke and "administrative health* record*" and valid*
14. stroke and "electronic* health* data*" and complet*
15. stroke and "routine* collected data*" and complet*
16. stroke and "primary care data*" and complet*
17. stroke and "general practice data*" and complet*
18. stroke and "secondary care data*" and complet*
19. stroke and "hospital* data*" and complet*
20. stroke and "administrative health* data*" and complet*
21. stroke and "electronic* health* record*" and complet*
22. stroke and "primary care record*" and complet*
23. stroke and "general practice record*" and complet*
24. stroke and "secondary care record*" and complet*
25. stroke and "hospital* record*" and complet*
26. stroke and "administrative* health* record*" and complet*
27. "acute coronary syndrome" and "electronic* health* data*" and valid*
28. "acute coronary syndrome" and "routine* collected data*" and valid*
29. "acute coronary syndrome" and "primary care data*" and valid*
30. "acute coronary syndrome" and "general practice data*" and valid*
31. "acute coronary syndrome" and "secondary care data*" and valid*
32. "acute coronary syndrome" and "hospital* data*" and valid*
33. "acute coronary syndrome" and "administrative health* data*" and valid*
34. "acute coronary syndrome" and "electronic* health* record*" and valid*
35. "acute coronary syndrome" and "primary care record*" and valid*
36. "acute coronary syndrome" and "general practice record*" and valid*
37. "acute coronary syndrome" and "secondary care record*" and valid*
38. "acute coronary syndrome" and "hospital* record*" and valid*
39. "acute coronary syndrome" and "administrative* health* record*" and valid*
40. "acute coronary syndrome" and "electronic* health* data*" and complet*
41. "acute coronary syndrome" and "routine* collected data*" and complet*
42. "acute coronary syndrome" and "primary care data*" and complet*
43. "acute coronary syndrome" and "general practice data*" and complet*
44. "acute coronary syndrome" and "secondary care data*" and complet*
45. "acute coronary syndrome" and "hospital* data*" and complet*
46. "acute coronary syndrome" and "administrative health* data*" and complet*
47. "acute coronary syndrome" and "electronic* health* record*" and complet*
48. "acute coronary syndrome" and "primary care record*" and complet*
49. "acute coronary syndrome" and "general practice record*" and complet*
50. "acute coronary syndrome" and "secondary care record*" and complet*
51. "acute coronary syndrome" and "hospital* record*" and complet*
52. "acute coronary syndrome" and "administrative* health* record*" and complet*
53. "myocardial infarction" and "electronic* health* data*" and valid*
54. "myocardial infarction" and "routine* collected data*" and valid*
55. "myocardial infarction" and "primary care data*" and valid*
56. "myocardial infarction" and "general practice data*" and valid*
57. "myocardial infarction" and "secondary care data*" and valid*
58. "myocardial infarction" and "hospital* data*" and valid*
59. "myocardial infarction" and "administrative health* data*" and valid*
60. "myocardial infarction" and "electronic* health* record*" and valid*
61. "myocardial infarction" and "primary care record*" and valid*
62. "myocardial infarction" and "general practice record*" and valid*
63. "myocardial infarction" and "secondary care record*" and valid*
64. "myocardial infarction" and "hospital* record*" and valid*
65. "myocardial infarction" and "administrative* health* record*" and valid*
66. "myocardial infarction" and "electronic* health* data*" and complet*
67. "myocardial infarction" and "routine* collected data*" and complet*
68. "myocardial infarction" and "primary care data*" and complet*
69. "myocardial infarction" and "general practice data*" and complet*
70. "myocardial infarction" and "secondary care data*" and complet*
71. "myocardial infarction" and "hospital* data*" and complet*
72. "myocardial infarction" and "administrative health* data*" and complet*
73. "myocardial infarction" and "electronic* health* record*" and complet*
74. "myocardial infarction" and "primary care record*" and complet*
75. "myocardial infarction" and "general practice record*" and complet*
76. "myocardial infarction" and "secondary care record*" and complet*
77. "myocardial infarction" and "hospital* record*" and complet*
78. "myocardial infarction" and "administrative* health* record*" and complet*
79. "heart failure" and "electronic* health* data*" and valid*
80. "heart failure" and "routine* collected data*" and valid*
81. "heart failure" and "primary care data*" and valid*
82. "heart failure" and "general practice data*" and valid*
83. "heart failure" and "secondary care data*" and valid*
84. "heart failure" and "hospital* data*" and valid*
85. "heart failure" and "administrative health* data*" and valid*
86. "heart failure" and "electronic* health* record*" and valid*
87. "heart failure" and "primary care record*" and valid*
88. "heart failure" and "general practice record*" and valid*
89. "heart failure" and "secondary care record*" and valid*
90. "heart failure" and "hospital* record*" and valid*
91. "heart failure" and "administrative* health* record*" and valid*
92. "heart failure" and "electronic* health* data*" and complet*
93. "heart failure" and "routine* collected data*" and complet*
94. "heart failure" and "primary care data*" and complet*
95. "heart failure" and "general practice data*" and complet*
96. "heart failure" and "secondary care data*" and complet*
97. "heart failure" and "hospital* data*" and complet*
98. "heart failure" and "administrative health* data*" and complet*
99. "heart failure" and "electronic* health* record*" and complet*
100. "heart failure" and "primary care record*" and complet*
101. "heart failure" and "general practice record*" and complet*
102. "heart failure" and "secondary care record*" and complet*
103. "heart failure" and "hospital* record*" and complet*
104. "heart failure" and "administrative* health* record*" and complet*

# **S2 Appendix. Data items extracted**

1. *Population:* general description, age (mean/median), sex, inclusion criteria, exclusion criteria;
2. *Index:* EHR name, setting (primary or secondary care), coding system, coverage (regional or national), diagnoses validated, codes validated;
3. *Comparators:* method of validation, description of method, definition of diagnosis used;
4. *Outcomes:* number of validations planned, number of validations conducted, main measures of validity (sensitivity, specificity, positive predictive value, negative predictive value), main raw data (true positives, false positives, true negatives, false negatives), individual codes validity (and raw data), age and sex validity (and raw data), time period validity (and raw data), diagnostic position validity (and raw data), any other relevant measures of validity;
5. *Study characteristics:* authors, publication year, study period (years), country, study aim, source of participants.

# **S3 Appendix. Adaptation of original QUADAS assessment questions to fit this review18**

Patient selection domain

1. Was a consecutive/ random sample of participants enrolled?
2. Did the study avoid inappropriate exclusions?
3. Were the included patients representative of the patients who will receive the diagnosis in practice?
4. Were selection criteria clearly described?

Index test domain

1. Were the index test results interpreted without knowledge of the results using the reference standard?
2. Was the execution of the index test described in sufficient detail to permit replication?

Reference standard domain

1. Is the reference standard likely to correctly classify the target condition?
2. Were the reference standard results interpreted without knowledge of the results of the index test?
3. Was the execution of the reference standard described in sufficient detail to permit replication?
4. Were the same clinical data available when results were interpreted as would be available in practice?

Flow and timing domain

1. Is the interval between index test(s) and reference standard appropriate? i.e. source of reference standard before time point in index test but time period short enough to be reasonably sure that the target condition did not change between the two?
2. Did all patients receive a reference standard? If not were the reasons explained?
3. Did all participants receive the same reference standard (regardless of index test result)?
4. Were all participants included in the analysis? If not were exclusions and reasons explained?

# **S4 Appendix. Grade assessment**

|  | Scoring |
| --- | --- |
| Risk of bias | - - Not serious: If >50% the studies have no QUADAS-2 domain at high risk of bias   - Serious: If studies fall between not serious and very serious   - Very serious: If studies with ≥2 QUADAS-2 domains at high risk of bias represent >50% of the total studies |
| Inconsistency | Not serious if have 0, serious if have 1, and very serious if have ≥2 of:   - - Heterogeneity is substantial (50-90%) or considerable (75-100%)   - Wide variance in sensitivity or PPV across studies   - Minimal/no overlap in sensitivity or PPV confidence intervals |
| Imprecision | - - Not serious: Narrow confidence intervals   - Serious: Wide confidence intervals   - Very serious: Very wide confidence intervals |
| Large magnitude of effect | - - Upgrade: If >90% of studies have validity estimate of >80% |
| Gradient of result | - - Upgrade: If studies with definite, probable and/or possible diagnostic categories show a suitable gradient in the sensitivity or PPV |

# **S5 Appendix. Additional validation results – time, age and sex**

*Heart failure*

There was no apparent trend in validity estimates over time; in 1986, a study reported a sensitivity of 65% and PPV 87%,88 while corresponding results from 2014 were 64% and 88%.77 Where individual studies stratified by time period,29,43,65,77,83 results were mixed with some increases and decreases in validity estimates.

By age breakdown, studies29,43,65 obtaining differing results. Merry *et al* found lower sensitivity and PPV in patients aged <50 years (30% and 60%, respectively) than those ≥50 years (44% and 81%, respectively). Pfister *et al* reported no difference in the PPV for patients aged <65 years and ≥65 years (95% and 96%). Sundboll *et al* found PPV a lower PPV with increasing age for first HF diagnosis (<60 years 100%, 60-80 years 74% and >80 years 69%) and a mixed trend for recurrent HF diagnosis (<60 years 50%, 60-80 years 84% and >80 years 75%). By sex, the PPVs were lower in women (63-94%) than men (83-97%) in each of the three studies29,33,43 which provided estimates.

*Myocardial infarction*

Similar to HF, there was no change in validity estimates for MI over time. One study80 used data from 1981 with PPV estimates of 78% and 81% obtained from two Swedish cities, and a 2014 study32 reported a PPV of 75%. Pajunen *et al*68 found estimates fluctuated over time; for example, among men aged 35-74 years sensitivity and PPV were 64% and 93%, respectively, then in 1993-1997 sensitivity increased to 78% while PPV decreased to 86%, and in 1998-2002 the sensitivity and PPV were 81% and 90%, respectively.

By age breakdown,29,34,65,70 sensitivity and PPV were largely similar between younger and older populations. By sex, the sensitivity and PPV were generally lower in women than men,34,99 although Dalsgaard *et al*32 found a much higher PPV in women (88%) than men (71%).

*Stroke*

There were no temporal trends in sensitivity or PPV for stroke diagnoses.

Aboa-Eboule *et al*101 and Kivimaki *et al*56 both included breakdowns by age, each study found sensitivity (76-79%) and PPV (72-82%) was higher in older populations, defined and ≥70 and ≥60 years, respectively, compared to younger ages (sensitivity 64-71%, PPV 67-73%). By sex results varied, Aboa-Eboule *et al*101 and Kivimaki *et al*56found sensitivity was higher for diagnoses among women. While Aboa-Eboule *et al* also found PPV was higher, three other studies25,32,56identified the PPV was lower for women than men.

# **S6 Appendix. Outcome definitions used in included studies**

Studies included multiple published definitions of HF, ACS and stroke. Below we have summarised the main features of each definition used.

| **Heart failure** | | | |
| --- | --- | --- | --- |
| ESC definition15 | ACC/AHA definition105 | Framingham criteria103 | Boston criteria104 |
| Clinical syndrome characterised by symptoms such as breathlessness, persistent coughing or wheezing, ankle swelling and fatigue, that may be accompanied by the following signs: jugular venous pressure, pulmonary crackles, increased heart rate and peripheral oedema. Acute heart failure is defined as rapid onset or worsening of symptoms, which may occur with or without previous cardiac disease. | Describe heart failure as a  progressive disease into four stages.  Stage A: high risk but without structural heart disease or symptoms.  Stage B:structural heart disease but without signs or symptoms – equivalent to NYHA class I (no limitation / ordinary physical activity).  Stage C: structural heart disease with prior or current symptoms – equivalent to NYHA class II-III (ordinary / slightly limited physical activity or comfortable at rest but slightly / markedly limited physical activity).  Stage D: refractory HF requiring intervention – equivalent to NYHA class IV (unable to carry on any physical activity or symptoms at rest). | Diagnosis requires two major or one major and two minor criteria  Major criteria:  paroxysmal nocturnal dyspnea or orthopnea; neck vein distension; rales; radiographic cardiomegaly; acute pulmonary edema; S3 gallop; central venous pressure >I6 cm water at the right atrium; circulation time ≥25 seconds; hepatojugular reflux  Minor criteria:  bilateral ankle edema; nocturnal cough; dyspnoea on ordinary exertion; hepatomegaly; pleural effusion; decrease in vital capacity by 33% from maximal value; tachycardia | Composite score based on points from three categories  Category I: history  rest dyspnea; orthopnea; paroxysmal nocturnal dyspnea; dyspnea while walking on level area; dyspnea while climbing  Category II: physical examination  heart rate; jugular venous elevation; lung crackles; wheezing; third heart sound  Category III: chest radiography  alveolar pulmonary edema; interstitial pulmonary edema; bilateral pleural effusion; cardiothoracic ratio >0.5; upper zone flow redistribution. |
| **Myocardial infarction** | | | |
| MONICA106 | AHA/ESC definition16 | Universal definition107 | Third universal definition108 |
| Definite:  a. definite ECG, or  b. symptoms with probable ECG and abnormal enzymes, or  c. symptoms and abnormal enzymes with ischemic or non-codable ECG or ECG not available, or  d. fatal case with “naked-eye appearance” of fresh MI and/or recent coronary occlusion found at necropsy  Possible:  symptoms but lesser or no ECG and enzyme findings to classify as definite | Definite:  1. evolving diagnostic ECG, or  2. diagnostic enzymes  Probable:  1. positive ECG, cardiac symptoms and missing biomarkers, or  2. positive ECG and equivocal biomarkers  Possible:  1. equivocal biomarkers and nonspecific ECG findings, or  2. equivocal biomarkers and cardiac symptoms or signs, or  3. missing biomarkers and positive ECG | 1. typical rise and gradual fall of troponin or more rapid rise and fall of CK-MB biomarkers of myocardial necrosis with at least one of:  a. ischemic symptoms  b. development of pathologic Q waves on the ECG  c. ECG changes indicative of ischemia  d. coronary artery intervention (e.g. coronary angioplasty)  Or  2. pathologic findings | Update of previous definition to account for more sensitive biomarkers |
| Stroke | | | |
| WHO109 | | MONICA110 | |
| Rapidly developing clinical signs of focal or global cerebral function disturbance lasting ≥24 hours or leading to death with no known cause other than vascular origin | | WHO definition with clinical signs and symptoms specified to be suggestive of subarachnoid hemorrhage, intracerebral hemorrhage, or cerebral infarction with the use of CT to aid identification | |

ACC, American College of Cardiology; AHA, American Heart Association; CK-MB, creatine kinase myocardial band; CT, computed tomography; ECG, electrocardiogram; ESC, European Society of Cardiology; HF, heart failure; MI, myocardial infarction; MONICA, Monitoring trends and determinants in cardiovascular disease; NYHA, New York Heart Association; WHO, World Health Organization

# **S1 Table. Characteristics of included studies**

| **Author, year** | **Data collection period** | **Validation study** | **Country** | **Source population** | **Population description** | **Mean (SD) age** | **N (%) female** | **EHR description** | **Coding system** | **Reference standard** |
| --- | --- | --- | --- | --- | --- | --- | --- | --- | --- | --- |
| **Heart failure** | | | | | | | | | | |
| Bosco-Lévy 201977 | 2014**a** | Y | France | PMSI & electronic discharge records at Hospital Center University De Bordeaux & Paris Hopital Européen Georges Pompidou | 2 random samples of HF patients, 1 from PMSI & 1 from electronic discharge records using free-text word searches | EHR 76.8 (13.4), RS 69.1 (11.5)  inclusion age: ≥40 years | EHR 90 (45.0), RS 66 (28.8) | PMSI, national secondary care system | ICD-10 | Medical record review |
| Delekta 201833 | 2007 | Y | Denmark | DNPR at Northern Denmark hospitals | Random sample of HF patients | 77 (68-84)**b** | 47**c** | DNPR, national secondary care system | ICD-10 | Medical record review |
| Gini 201697 | unknown | Y | Italy | HSD at 12 GP practices | HF patients**d** | NR | NR | HSD, national primary care system | unknown | GP questionnaire |
| Heerdink 199859 | 1990**e** | N | The Netherlands | PHARMO in 6 cities | Random sample of CHF patients | NR, inclusion age: ≥55 years | NR | PHARMO, national secondary care system | ICD-9 | Medical record review |
| Hjerpe 201082 | 2002-2003 | Y | Sweden | SPCD GP practices | Random sample of patients with CVD prescription from each practice | 69 (28-95)**b** | 630 (52) | SPCD, regional primary care system | ICD-10 | Medical record review |
| Ingelsson 200583 | 1976-2001 | Y | Sweden | Uppsala Longitudinal Study of Adult Men cohort study participants with linked data in HDR | HF patients | NR, inclusion age: ≥50 years | NA, only men included | HDR, national secondary care system | ICD-8, ICD-9, ICD-10 | Medical record review |
| Kaspar 201885 | 2009 | Y | Germany | Würzburg University Hospital EHR | Random sample of consecutive patients treated at the Medical Department | NR | NR | Clinical data warehouse, secondary care system | ICD unknown version | Medical record review |
| Khand 200554 | 1997-1998 | Y | Scotland, UK | Dishcarge diagnoses at Glasgow Royal Infirmary Hospital & affiliated (principally geriatric) units | HF hospitalised patients**f** | HF discharge code 68.2 (11.9) | HF discharge code male 54**c** | Unnamed, secondary care system | ICD-10 | Medical record review |
| Kümler 200824 | 1998-1999 | Y | Denmark | DNPR at Amager Hospital in Copenhagen | Consecutive patients admitted to the hospital | 78.0**g**  inclusion age: ≥40 years | 72 (50.8)**g** | DNPR, national secondary care system | ICD-10 | Clinical examination |
| Mähönen 201367 | 1969-1997 | Y | Finland | FINRISK survey data participants with linked data in HDR, CDR**h**, DRR**h** or pharmacy prescription**h** | All participants of the 1997 FINRISK survey | NR | NR | HDR, national secondary care system | ICD-8, ICD-9, ICD-10 | Medical record review |
| Mard 201028 | 2005-2007 | Y | Denmark | DNPR at Herlev University Hospital | Patients referred to the outpatient clinic, HF clinic or admitted to the cardiology ward | 75 (65-82, 33-99)**i** | 320 (42.2) | DNPR, national secondary care system | ICD-10 | Medical record review |
| Pfister 201343 | 1997-2009 | Y | England, UK | EPIC study participants linked to hospital discharge data | Random sample of HF patients | 64.7 (7.5)  inclusion age: 39-79 years | 42.2**c** | Unnamed, secondary care system | ICD-10 | Medical record review |
| Valk 201694 | 2011 | Y | The Netherlands | EHR at 30 Amersfoort GPs | HF patients | 77.9 (11.4) | 57.8**c** | Unnamed, national primary care system | ICPC | Medical record review |
| Van Doorn 201795 | 2013-2014 | Y | The Netherlands | CAFe study participants with GP EHR linked data | ECG confirmed AF patients | 77 (68-84)**b** | 47.7**c** | Unnamed, national primary care system | ICPC | Medical record review |
| Verdú-Rotellar 201796 | 2014 | Y | Spain | EHR at 2 Barcelona GP practices | HF patients | 78 (10)  inclusion age: ≥15 years | 58**c** | Unnamed, primary care system | ICD-10 | Medical record review |
| **Acute coronary syndrome** | | | | | | | | | | |
| Bezin 201576 | 2011 | Y | France | PMSI at Bordeaux teaching hospitals | Random sample of ACS patients | 66.5 (11.5) | 18 (18.0) | PMSI, national secondary care system | ICD-10 | Medical record review |
| Bork 200722 | 2007 | Y | Denmark | DNPR at Northern Denmark hospitals | Random sample of ACS patients | 71.0 (41.4-91.0)**j** | 178 (36.0) | DNPR, national secondary care system | ICD-10 | Medical record review |
| Joensen 200937 | 1994-2003 | Y | Denmark | Diet, Cancer, and Health cohort study participants with linked data in DNPR | ACS patients born in Denmark & living in Copenhagen or Aarhus | 56.1 (52.4-60.3)**b** | NR | DNPR, national secondary care system | ICD-8, ICD-10 | Medical record review |
| Pajunen 200568 | 1988-2002 | Y | Finland | FINMONICA/ FINAMI Registry, CDR**h** & HDR | Fatal & non-fatal IHD patients | NR | NR | HDR, national secondary care system | ICD-9  ICD-10 | AMI registry |
| **Acute coronary syndrome – only myocardial infarction** | | | | | | | | | | |
| Barchielli 201275 | 2003 | Y | Italy | Tuscany regional Tosc-AMI Registry & hospital EHR | Random sample of AMI & IHD patients | NR | NR | Unnamed, national secondary care system | ICD-9-CM | Medical record review |
| Coloma 201323 | 1996-2009 | Y | Italy, The Netherlands,  Denmark | 3 databases from the Exploring & Understanding Adverse Drug Reactions project | Random sample of AMI patients | Italy 68, NL 66, DK 67 | Italy 68 (34), NL 154 (38.5), DK 45 (30.4) | Italy HSD & NL IPCI, national primary care systems DK: Aarhus, regional secondary care system | Italy ICD9-CM,  NL ICPC,  DK ICD-10 | Medical record review |
| Donnan 200350 | unknown | Y | Scotland | 10 Tayside GP practices | Random sample of AMI patients | NR, inclusion age: ≥35 years | NR | Unnamed, primary care system SMR1, national secondary care system | Read, ICD-9 | Medical record review |
| Egholm 201634 | 2006-2012 | Y | Denmark | Clinical drug-eluting coronary stent studies participants with linked data in the DNPR | PCI treated patients at Aarhus University Hospital cardiology ward | 66 (58-73)**b** | 1,448 (25.3) | DNPR, national secondary care system | ICD-10 | AMI registry & medical record review |
| Hammad 200852 | 1997-2004 | Y | UK | GPRD participating GP practices | Random sample of AMI patients with NSAID & non-NSAID prescriptions | NR, inclusion age: 40-84 years | NR | GPRD (now CPRD), national primary care system | read | GP questionnaire |
| Hammar 200158 | 1987 & 1995e | N | Sweden | HDR in Swedish hospitals & CRD**h** | National samples of AMI & IHD**k** patients | NR | NR | HDR, national secondary care system | ICD-9 | Medical record review |
| Hammar 199480 | 1981 | Y | Sweden | Stockholm & Gavleborg hospitals | Random sample of patients by age group from 11 Stockholm hospitals & random sample of patients at 5 Gavleborg hospitals | NR, inclusion age: 30-94 years | NR | HDR, national secondary care system | ICD-8 | Medical record review |
| Herrett 201353 | 2003-2009 | Y | England, UK | CPRD, HES, MINAP & ONS deaths**h** | AMI patients | CPRD 73 (61-81)**b** HES 73 (61-82)**b** | CPRD 5,810 (36.7) HES 5,072 (36.7) | CPRD, national primary care system HES, national secondary care system | read, ICD-10 | ACS registry |
| Joensuu 199284 | 1977-1986 | Y | Finland | HDR in Finnish hospitals | AMI patients resident in rural districts of Oulu | 67 (33-96)**j** | NR | HDR, national secondary care system | ICD-8 | Medical record review |
| Madsen 199026 | 1979-1980 | Y | Denmark | Danish Heart Registry & DNPR | AMI patients from hospitals in the Copenhagen & 3 hospitals in Aarhus | NR | NR | DNPR, national secondary care system | ICD-8 | Heart registry & medical record review |
| Madsen 200327 | 1982-1991 | Y | Denmark | Danish Heart Registry, DNPR & CDR**h** | AMI patients in Copenhagen hospitals | NR, inclusion age: 25-74 years | NR | DNPR, national secondary care system | ICD-8 | AMI registry |
| Mähönen 199799 | 1983-1990 | Y | Finland | FINMONICA AMI Register linked to HDR | IHD & cerebrovascular disease patients**l** in Southwestern Finland | NR, inclusion age: 25-64 years | NR | HDR, national secondary care system | ICD-8, ICD-9 | AMI registry |
| McAlpine 199842 | 1993-1995 | Y | Scotland, UK | SMR1 in Tayside | AMI or possible AMI patients | NR, inclusion age: 16-44 years | NA, only women included | SMR1, national secondary care system | ICD-9 | Medical record review |
| Palomäki 1994100 | 1987-1990 | Y | Finland | HDR at Kuopio University Hospital | Patients with suspected IHD events**l** | NR, inclusion age: 35-64 years | NR | HDR, national secondary care system | ICD-9 | AMI registry |
| Pietilä 199769 | 1980-1990 | Y | Finland | Helsinki Heart Study RCT participants with linked data in HDR & CDR**h** | Coronary primary prevention patients followed up for IHD**l** | NR, inclusion age: 40-55 years | NA, only men included | HDR, national secondary care system | ICD-8, ICD-9 | Medical record review |
| Rapola 199770 | 1985-1989 & 1991 | Y | Finland | ATBC RCT conducted in the Southern & Western Finland participants with HDR or CDR**h** linked data | Patients who smoked ≥5 cigarettes a day | NR, inclusion age: 50-69 years | NA, only men included | HDR, national secondary care system | ICD-8  ICD-9 | Medical record review |
| **Stroke** | | | | | | | | | | |
| Aboa-Eboulé 2013101 | 2004-2008 | Y | France | Dijon Stroke Registry & FHDDB at Dijon Teaching Hospital | Stroke patients resident in Dijon | EHR 75.4 (15.5), RS 75.4 (14.8) | EHR 504 (55.8), RS 452 (55.7) | FHDDB, national secondary care system | ICD-10 | Stroke registry |
| Appelros 201171 | 1999-2000 | Y | Sweden | Obrebro Stroke Registry, CDR**h** & IPR | Stroke patients resident in Orebro | women 78.3 & men 83.9 | 208 (55) | IPR, national secondary care system | ICD-10 | Stroke registry |
| Baldereschi 201874 | 2015 | Y | Italy | HDR at 6 hospitals in Florence | Stroke patients recorded in the emergency or any inpatient department | NR | NR | HDR,  secondary care system | ICD-9-CM | Medical record review |
| Barer 199640 | unknown | Y | England, UK | Stroke registry & Liverpool Teaching Hospital EHR | Stroke patients | NR | NR | Unnamed,  secondary care system | ICD-9 | Stroke registry |
| Cook 201341 | 1990-2009 | N | UK | THIN participating GP practices | Stroke patients with and without AD | Study cohort 79.8 (8.1)  inclusion age: ≥50 years | Study cohort 6,748 (67.8) | THIN, national primary care system | Read | GP questionnaire & medical record review |
| Davenport 199649 | unknown | Y | Scotland, UK | Lothian Stroke Register & SMR1 | Stroke patients | NR | NR | SMR1, national secondary care system | ICD-9 | Stroke registry & medical record review |
| Ekker 201957 | 1998-2017 | N | The Netherlands | Whole study: linked national registries (HDR, CDR & population register) Validation cohort: HDR at 3 teaching hospital | Stroke patients | Study cohort women 41.4 (7.0), men 42.3 (6.5)  inclusion age: 18-50 years | NR | HDR, national secondary care system | ICD-9, ICD-10 | Medical record review |
| Ellekjaer 1999102 | 1994-1996 | Y | Norway | Innherred Nord-Trøndelag County Stroke Registry | Cerebrovascular patients**l** | NR, inclusion age: ≥15 years | NR | HDR, national secondary care system | ICD-9 | Stroke registry |
| Frost 200735 | 1980-2002 | N | Denmark | DNPR at 11 hospitals in Aarhus country | Random sample of stroke patients with AF | NR | NR | DNPR, national secondary care system | ICD-8, ICD-10 | Medical record review |
| Gaist 200036 | 1977-1995 | N | Denmark | Whole study linked DNPR & DCPR, validation cohort included Funen County hospitals | SAH patients | Study cohort 53.5 | Study cohort  5,466 (58.4) | DNPR, national secondary care system | ICD-8, ICD-10 | Medical record review |
| Gaist 201351 | 2000-2008 | Y | UK | THIN participating GP practices | Patients followed until stroke, age 90 years, death, or study end | NR, inclusion age: 20-89 years | NR | THIN, national primary care system | read | GP questionnaire |
| Giroud 201578 | 2009-2010 | Y | France | FHDDB at 31 hospitals | Random sample of 56 stroke & TIA**m** hospital stays from each hospital | ≥65 years 1,056 (63.3)**n**  inclusion age: ≥18 years | 786 (47.1) | FHDDB, national secondary care system | ICD-10 | Medical record review |
| Haesebaert 201379 | 2006-2007 | Y | France | AVC69 cohort study participants with linked data in PMSI | Stroke patients resident in Rhône | TP 72.8 (14.3), FN 77.6 (14.5)  inclusion age: ≥18 years | TP 153 (48.9), FN 90 (59.2) | PMSI, national secondary care system | ICD-10 | Medical record review |
| Holmqvist 201260 | 1997-2009 | N | Sweden | Epidemiological Investigation of Rheumatoid Arthritis case-control study participants with linked data in NPR | Stroke patients with & without RA | NR | NR | NPR, national secondary care system | ICD-10 | Medical record review |
| Johnsen 200238 | 1993-1998/9**o** | Y | Denmark | Diet, Cancer, and Health cohort study participants with linked data in DNPR | Cerebrovascular patients**l** born in Denmark & living in Copenhagen or Aarhus | 58 (50-65)**p** | 41.4**c** | DNPR, national secondary care system | ICD-10 | Medical record review |
| Kirkman 200955 | 2002-2007 | Y | England, UK | Discharge diagnoses at 4 hospitals in Newcastle upon Tyne | Haemorrhagic stroke patients | ICH 66.4 (11-96)**j**, SAH 55.4 (2-91)**j** | ICH 441 (47.0), SAH 713 (63.5) | PAS, secondary care system | ICD-10 | Medical record review |
| Kivimäki 201756 | 1997-2009 | Y | England, UK | UK Whitehall II cohort study participants with linked HES data | London-based nonindustrial government workers followed up for stroke & IHD**l** | Cohort study 56**q** | Cohort study 30**c** | HES, national secondary care system | ICD-9, ICD-10 | Medical record review |
| Köster 201364 | 2004 | Y | Sweden | Northern Sweden Stroke Registry, CDR**h** & NPR | Stroke patients | NR, inclusion age: ≥20 years | NR | NPR, national secondary care system | ICD-10 | Stroke registry |
| Krarup 200739 | 1998-1999 | Y | Denmark | Copenhagen City Heart Study participants with linked DNPR data | Stroke & TIA**m** patients living in Østerbro & Nørrebro (urban Copenhagen) residents | women 75 & men 71.4 | 120 (51) | DNPR, national secondary care system | ICD-10 | Medical record review |
| Leone 200486 | 1998 | Y | Italy | SISR at Novara Hospital | Stroke & TIA patients**m** | NR | NR | SISR, regional secondary care system | ICD-9 | Medical record review |
| Leppälä 199972 | 1985-1992 | Y | Finland | ATBC RCT conducted in the Southern & Western Finland participants with HDR or CDR**h** linked data | Cerebrovascular disease patients**l** who smoked ≥5 cigarettes a day | 62.9 (51.0-76.6)**p** | NA, only men included | HDR, national secondary care system | ICD-8, ICD-9 | Medical record review |
| Lühdorf 201725 | 1993-2009 | Y | Denmark | Diet, Cancer, and Health cohort study participants with linked data in DNPR | Stroke patients born in Denmark and living in Copenhagen or Aarhus | NR | NR | DNPR, national secondary care system | ICD-8, ICD-10 | Medical record review |
| Nieuwkamp 201461 | 1997-2008 | N | The Netherlands | HDR at University Medical Center Utrecht | SAH patients | 58.1  inclusion age: ≥20 years | 64.2**c** | HDR, national secondary care system | ICD-9 | Medical record review |
| Øie 201889 | 2008-2014 | Y | Norway | NPR at St Olavs University Hospital | Intracranial haemorrhage**r** & clinically similar diagnosed patients resident in Sør- Trøndelag County | NR, inclusion age: ≥18 years | NR | NPR, national secondary care system | ICD-10 | Medical record review |
| Rinaldi 200390 | 1999 | Y | Italy | General Hospital of Lugo di Romagna EHR | Clinically diagnosed stroke patients | 78 (10) 80 (4-99)**p** | 77 (49.0) | Unnamed, secondary care system | ICD-9 | Clinical assessment or medical record review |
| Ruigómez 201044 | 2000-2004 | Y | UK | THIN participating GP practices | Cerebrovascular disease patients**l** | NR, inclusion age: 40-84 years | NR | THIN, national primary care system | read | GP questionnaire & medical record review |
| Sansom 201545 | unknown | Y | UK | Unnamed acute hospital trust EHR | Consecutive acute stroke patients | NR | NR | Unnamed, national secondary care system | ICD-10 | Medical record review |
| Sedova 201592 | 2011 | Y | Czech Republic | NRHOSP from sample of hospitals | 10 randomly selected hospitals with randomly selected stroke & TIA**m** patients | NR | NR | NRHOSP, national secondary care system | ICD-10 | Medical record review |
| Spolaore 200593 | 1999 | Y | Italy | HDR at Veneto hospitals | Stroke patients | NR | NR | HDR, national secondary care system | ICD-9 | Medical record review |
| Stegmayr 199266 | 1985-1989 | Y | Sweden | Northern Sweden MONICA study participants linked to hospital EHR | Stroke patients | NR, inclusion age: 25-74 years | NR | Unnamed, secondary care system | ICD-9 | Stroke registry |
| Tolonen 200773 | 1993-1998 | Y | Finland | FINSTROKE registry linked to HDR & CDR**h** | Stroke patients | NR, inclusion age: ≥25 years | NR | HDR, national secondary care system | ICD-9, ICD-10 | Stroke registry |
| Varmdal 201663 | 2012 | Y | Norway | Stroke register & NPR | Confirmed & potential acute stroke patients | NR, inclusion age: ≥18 years | NR | NPR, national secondary care system | ICD-10 | Medical record review |
| Vila-Corcoles 201462 | 2008-2011 | N | Spain | Cohort study participants with linked MBDS data from Joan XXIII University Hospital or Santa Tecla Hospital | Ischaemic stroke patients | 71.7 (8.6)  inclusion age: ≥60 years | 55**c** | MBDS, national secondary care system | ICD-9 | Medical record review |
| Wildenschild 201431 | 2009 & 2010**s** | Y | Denmark | Stroke registry & DNPR | Confirmed & potential stroke patients | NR, inclusion age: ≥18 years | NR | DNPR, national secondary care system | ICD-10 | Medical record review |
| Zhou 201448 | 2003-2011 | N | UK | Cohort study participants with linked CPRD data | Patients initiating angiotensin receptor blockers | NR, inclusion age: 40-95 years | NR | CPRD, national primary care system | read | GP questionnaire |
| **Heart failure and acute coronary syndrome** | | | | | | | | | | |
| Merry 200965 | 1987-2003 | Y | The Netherlands | CAREMA cohort study participants linked to the University Hospital Maastricht CIS & HDR | Random sample of Maastricht residents | Study cohort 41.7 (20.1-60.9)**j**  inclusion age: 20-59 years | Study cohort 11,175 (52.9) | HDR, national secondary care system | ICD-9 | Local cardiology database |
| Sundbøll 201629 | 2010-2012 | Y | Denmark | DNPR at Aarhus University Hospital & regional hospitals of Randers & Herning in Central Denmark | Patients from cardiology, internal medicine, acute medicine & neurology wards | NR | NR | DNPR, national secondary care system | ICD-10 | Medical record review |
| **Heart failure and myocardial infarction** | | | | | | | | | | |
| Nilsson 199488 | 1986 | Y | Sweden | HDR for discharges from internal medicine, pediatric, general surgical, orthopaedic, urological or gynecological departments | Patients with cerebrovascular disease & IHD**l** born on a specific date with an odd year of birth | NR | NR | NPR, national secondary care system | ICD-8 | Medical record review |
| Thygesen 201130 | 1998-2007 | Y | Denmark | DNPR at all hospitals in North Jutland Region | Patients with a Charlson comorbidity condition diagnosed | NR | NR | DNPR, national secondary care system | ICD-10 | Medical record review |
| Van Staa 199446 | 1990-1992 | Y | UK | VAMP participating GP practices | Patients with ≥1 prescription of Sulphonyl Urea | NR, inclusion age: ≥20 years | NR | VAMP (now CPRD), national primary care system |  | Medical record review |
| **Myocardial infarction and stroke** | | | | | | | | | | |
| Bernal 201998 | 2012 | Y | Spain | DIOCLES cross-sectional study participants with linked data in MBDS | DIOCLES participants hospitalized with suspected ACS | 67.0 (13.0)  inclusion age: ≥18 years | 375 (24.4) | MBDS, national secondary care system | ICD-9-CM | ACS registry |
| Dalsgaard 201932 | 2001-2014 | Y | Denmark | ADDITION cohort study participants with linked data in DNPR | AMI & stroke patients with type 2 diabetes | NR, inclusion age: 40-69 years | NR | DNPR, national secondary care system | ICD-10 | Medical record review |
| Heliövaara 198481 | 1970-1975 | Y | Finland | The Social Insurance Institution’s mobile clinic screening participants | Patients screened 1966-1972 who were re-examined 1973-1977 | NR, inclusion age: 30-59 years | NR | HDR, national secondary care system | ICD-8 | Medical record review |
| Lindblad 199387 | 1977-1987 | Y | Sweden | Hypertension register linked to CDR**h** & IPR | AMI & stroke patients with hypertension | NR, inclusion age: 40-69 years | NR | IPR, national secondary care system | ICD-8, ICD-9 | Medical record review |
| Rodrigo-Rincon 201591 | 2008 & 2010 | Y | Spain | Hospital de Navarra CADB | Surgical patients with adverse events during hospitalization | 60.8 (18.2) | 660 (41.2) | CADB, secondary care system | ICD-9-CM | Medical record review |
| Wright 201247 | 1997-2005 | Y | England, UK | Million Women Study participants with linked HES data | Random sample of IHD, cerebrovascular disease & venous thrombo-embolism patients**l** | NR | NA, only women included | HES, national secondary care system | ICD-10 | GP questionnaire |

a 2009 included for time comparison in sub-analysis; b median age with interquartile range; c percentage only; d also included diabetes, IHD & hypertension patients to validate diagnoses but results not included here; e years for which data were validated from a wider study period; f also included atrial fibrillation patients and patients in the local ECG database to identify heart failure patients but results not included here as could not determine results; g result for patients with a heart failure diagnosis in the EHR and reference standard, also reported results for patients with; 1) no HF in EHR or RS (mean age 69.7, 848 (40.1%) female), HF in EHR only (mean age 79.5, 8 (26.7%) female), HF in RS only (mean age 76.8, 138 (45.5%) female); h results for this source not included here; i median with interquartile range and range; j mean age with range; k IHD patients included to calculate sensitivity of MI diagnoses rather than to validate IHD; l only results for sub-diagnoses relevant to this review (HF, ACS and stroke) included here; m also included TIA patients to validate diagnosis but results not included here; n number with proportion in age group; o end year depended on area of residence; p median age with range; q mean with no SD; r also validated subdural haemorrhage but results not included here; s two separate validations methods, one in 2009 and one in 2010

AMI, acute myocardial infarction; ATBC, Alpha-Tocopherol, Beta-carotene Cancer prevention study; CADB, Clinical and Administrative DataBase; CAREMA, Cardiovascular registry Maastricht; CDR, Cause of Death Register; CIS, Cardiology Information System; CPRD, Clinical Practice Research Datalink; DCPR, Danish Central Person Registry; DIOCLES, Description of Ischemic Heart Disease in the Spanish Territory; DNPR, Danish National Patient Register; DRR, Drug Reimbursement Register; EHR, Electronic Health Record; EPIC, European Prospective Investigation into Cancer & nutrition study; FHDDB, French Hospital Discharge DataBase; GPRD, General Practice Research Database; HDR, Hospital Discharge Register; HES, Hospital Episode Statistics; HF, heart failure; HSD, Health Search Database; ICPC, International Classification of Primary Care; ICD, International Classification of Diseases; IPCI, Integrated Primary Care Information; IPR, In-Patient Register; MBDS, Minimum Basic Data Set; MINAP, Myocardial Ischaemia National Audit Project; MONICA, MONItoring of trends and determinants in CArdiovascular disease; NPR, National Patient Register; NR, not reported; NRHOSP, National Registry of Hospitalized Patients; ONS, Office for National Statistics; PAS, Patient Adminstration System; PCI, percutaneous coronary intervention; PMSI, Programme de Médicalisation des Systèmes d’Information; RCT, randomized controlled trial; SISR, Sistema Informativo Sanitario Regionale; SMR1, Scottish Morbidity Record; SPCD, Skaraborg Primary Care Database; THIN, The Health Improvement Network; VAMP, Value Added Information Medical Products Ltd

# **S2 Table. Study results**

**A. Heart failure**

| **Author, year** | **Diagnostic code(s)** | **Records assesseda** | **Parameters** | **Sensitivity** | **Specificity** | **PPV** | **NPV** | **Quality of study** |
| --- | --- | --- | --- | --- | --- | --- | --- | --- |
| **Secondary care EHRs** | | | | | | | | |
| Bosco-Lévy 201977 | ICD-10 I50 | 200 (EHR), 229 (RS) | -ESC definite & probable  -First diagnosis  -Any diagnostic position | 64.2 (58.0‐70.4) |  | 88.0 (83.5-92.5) |  | High |
| -ESC definite  -First diagnosis  -Any diagnostic position |  |  | 60.5 (53.7‐67.3) |  |
| 73 | -ESC definite & probable  -First diagnosis  -Primary diagnostic position |  |  | 95.9 (88.5-99.1) |  |
| -ESC definite  -First diagnosis  -Primary diagnostic position |  |  | 69.9 (59.3-80.4) |  |
| 127 | -ESC definite & probable  -First diagnosis  -Secondary diagnostic position |  |  | 83.5 (77.0-89.9) |  |
| -ESC definite  -First diagnosis  -Secondary diagnostic position |  |  | 55.1 (46.5-63.8) |  |
| 200 | -ESC definite & probable  -First diagnosis  -Any diagnostic position  -2009 comparison |  |  | 74.5 (68.5‐80.5) |  |
| Delekta 201833 | ICD-10 I50 | 500 | -ESC definite & probable  -Any diagnostic position |  |  | 83.6 (80.1-86.7) |  | High |
| -ESC definite  -Any diagnostic position |  |  | 61.0 (56.7-65.2)b,c |  |
| 400 | -ESC definite & probable  -Primary diagnostic position |  |  | 88.0 (84.4-91.0) |  |
| 100 | -ESC definite & probable  -Secondary diagnostic position |  |  | 66.0 (55.8-75.2) |  |
| 267 | -ESC definite & probable  -Any diagnostic position  -Men |  |  | 85.4 (80.6-89.4) |  |
| 233 | - ESC definite & probable  -Any diagnostic position  -Women |  |  | 81.5 (76.0-86.3) |  |
| Heerdink 199859 | ICD-9 428 | 138 | -Framingham definition |  |  | 79.7 |  | High |
| -Boston definition |  |  | 81.2 |  |
| Ingelsson 200583 | ICD-8 427.00, 427.10, 428.99; ICD-9 428; ICD-10 I11.0, I50 | 317 | -ESC definite  -Any diagnostic position |  |  | 81.7 (77.1-85.6)c |  | Medium |
| -ESC definite & questionable  -Any diagnostic position |  |  | 97.8 (95.5-98.9)b,c |  |
| 140 | -ESC definite  -Primary diagnostic position |  |  | 95.0 (90.0-97.6)c |  |
| -ESC definite & questionable  -Primary diagnostic position |  |  | 99.3 (96.1-99.9)b,c |  |
| 112 | -ESC definite  -Secondary diagnostic position |  |  | 75.9 (67.2-82.9)c |  |
| -ESC definite & questionable  -Secondary diagnostic position |  |  | 97.3 (92.4-99.1)b,c |  |
| 65 | -ESC definite  -Third-sixth diagnostic position |  |  | 63.1 (50.9-73.8)c |  |
| -ESC definite & questionable  -Third-sixth diagnostic position |  |  | 95.4 (87.3-98.4)b,c |  |
| ICD-8 427.00, 427.10, 428.99; ICD-9 428 | 108 | -ESC definite  -Any diagnostic position  -1976-1991 |  |  | 88.0 (80.5-92.8)c |  |
| -ESC definite & questionable  -Any diagnostic position  -1976-1991 |  |  | 97.2 (92.1-99.1)b,c |  |
| ICD-9 428 | 101 | -ESC definite  -Any diagnostic position  -1992-1996 |  |  | 79.2 (70.3-86.0)c |  |
| -ESC definite & questionable  -Any diagnostic position  -1992-1996 |  |  | 97.0 (91.6-99.0)b,c |  |
| ICD-10 I11.0, I50 | 108 | -ESC definite  -Any diagnostic position  -1997-2001 |  |  | 77.7 (69.1-84.6)c |  |
| -ESC definite & questionable  -Any diagnostic position  -1997-2001 |  |  | 99.1 (94.9-99.8)b,c |  |
| Kaspar 201885 | ICD-10 I11, I13.0, I13.2, I50 | 1,042 |  | 50.0 (43.0-56.1)c |  | 94.0 (88.2-97.1)c |  | High |
| Khand 200554 | ICD-10 I11.0-1, I25.5, I42.9, I50.1-2 | 339 | -ESC definite, probable & possible  -Any diagnostic position |  |  | 86.7 (82.6-89.9)c |  | High |
| -ESC definite & probable  -Any diagnostic position |  |  | 77.3 (72.5-81.5)c |  |
| -ESC definite  -Any diagnostic position |  |  | 65.5 (60.2-70.4)c |  |
| Kümler 200824 | ICD-10 I50 | 3,201 | -ESC definition | 29.4 (25.3-33.8)c | 98.9 (98.5-99.2)c | 80.8 (73.9-86.2)c | 90.0 (88.9-91.1)c | High |
| Mähönen 201367 | ICD-8 427.00, 427.10, 428; ICD-9 402.9B, 414.8, 428; ICD-10 I11.0, I13.0, I13.2, I50 | 325 | -Study defined probable or possible | 10.5 (7.6-14.4)c | 99.8 (99.7-99.9)c | 73.3 (59.0-84.0)c | 96.4 (96.0-96.8)c | High |
| Mard 201028 | ICD-10 I11.0, I13.0, I13.2, I42.0, I42.6-9, I50.0-1, I50.9 | 758 | -ESC definition  -First or recurrent diagnosis |  |  | 84.0 (81.2-86.6) |  | High |
| 479 | -ESC definition  -First diagnosis |  |  | 77.9 (74.1-81.6) |  |
| Merry 200965 | ICD-9 428 | 84 (EHR), 154 (RS) |  | 43 (35-51) |  | 80 (71-88) |  | High |
| Unknown | -Aged <50 years | 30 (2-58) |  | 60 (17-100) |  |
| -Aged ≥50 years | 44 (36-52) |  | 81 (72-90) |  |
| -1987-1995 | 45 (28-62) |  | 68 (49-88) |  |
| -1996-2003 | 42 (33-51) |  | 84 (74-93) |  |
| Nilsson 199488 | ICD-8 427 | 24 | -Primary diagnostic position | 65.0 (43.3-81.9)c,d |  | 86.7 (62.1-96.3)b,c |  | High |
| Pfister 201343 | ICD-10 I50 | 396 | -ESC definite, probable & possible  -Any diagnostic position |  |  | 95.7 (93.2-97.3)c |  | High |
| -ESC definite & probable  -Any diagnostic position |  |  | 88.1 (84.6-91.0)c |  |
| -ESC definite  -Any diagnostic position |  |  | 77.8 (73.4-81.6)c |  |
| 165 | -ESC definite, probable & possible  -Any diagnostic position  -Aged <65 years |  |  | 95.1 (90.7-97.5)c |  |
| -ESC definite & probable  -Any diagnostic position  -Aged <65 years |  |  | 88.5 (82.7-92.5)c |  |
| -ESC definite  -Any diagnostic position  -Aged <65 years |  |  | 78.8 (71.9-84.3)c |  |
| 231 | -ESC definite, probable & possible  -Any diagnostic position  -Aged ≥65 years |  |  | 96.1 (92.8-97.9)c |  |
| -ESC definite & probable  -Any diagnostic position  -Aged ≥65 years |  |  | 87.9 (83.0-91.5)c |  |
| -ESC definite  -Any diagnostic position  -Aged ≥65 years |  |  | 77.1 (71.2-82.0)c |  |
| 229 | -ESC definite, probable & possible  -Any diagnostic position  -Men |  |  | 96.9 (93.8-98.5)c |  |
| -ESC definite & probable  -Any diagnostic position  -Men |  |  | 90.4 (85.9-93.6)c |  |
| -ESC definite  -Any diagnostic position  -Men |  |  | 81.2 (75.7-85.8)c |  |
| 167 | -ESC definite, probable & possible  -Any diagnostic position  -Women |  |  | 94.0 (89.3-96.7)c |  |
| -ESC definite & probable  -Any diagnostic position  -Women |  |  | 85.0 (78.8-89.6)c |  |
| -ESC definite  -Any diagnostic position  - Women |  |  | 73.1 (65.9-79.2)c |  |
| 107 | -ESC definite, probable & possible  -Any diagnostic position  -Apr 1997-Mar 2003 |  |  | 99.1 (94.9-99.8) |  |
| -ESC definite & probable  -Any diagnostic position  -Apr 1997-Mar 2003 |  |  | 91.6 (84.8-95.5) |  |
| -ESC definite  -Any diagnostic position  -Apr 1997-Mar 2003 |  |  | 82.2 (73.9-88.3) |  |
| 289 | -ESC definite, probable & possible  -Any diagnostic position  -Apr 2003-Mar 2009 |  |  | 94.5 (91.2-96.6) |  |
| -ESC definite & probable  -Any diagnostic position  -Apr 2003-Mar 2009 |  |  | 86.8 (82.5-90.3) |  |
| -ESC definite  -Any diagnostic position  -Apr 2003-Mar 2009 |  |  | 76.1 (70.9-80.7) |  |
| Sundbøll 201629 | ICD-10 I11.0, I13.0, I13.2, I42.0, I42.6-9, I50.0-3, I50.8-9 | 95 | -First diagnosis  -Any diagnostic position |  |  | 76 (66-83) |  | High |
| 96 | -Recurrent diagnosis  -Any diagnostic position |  |  | 76 (67-83) |  |
| 50 | -First diagnosis  -Any diagnostic position  -Men |  |  | 83 (72-91) |  |
| 22 | -First diagnosis  -Any diagnostic position  -Women |  |  | 63 (46-77) |  |
| 45 | -Recurrent diagnosis  -Any diagnostic position  -Men |  |  | 80 (68-89) |  |
| 28 | -Recurrent diagnosis  -Any diagnostic position  - Women |  |  | 70 (55-82) |  |
| 13 | -First diagnosis  -Any diagnostic position  -Aged <60 years |  |  | 100 (77-100) |  |
| 50 | -First diagnosis  -Any diagnostic position  -Aged 60-80 years |  |  | 74 (60-84) |  |
| 32 | -First diagnosis  -Any diagnostic position  -Aged >80 years |  |  | 69 (51-82) |  |
| 14 | -Recurrent diagnosis  -Any diagnostic position  -Aged <60 years |  |  | 50 (27-73) |  |
| 50 | -Recurrent diagnosis  -Any diagnostic position  -Aged 60-80 years |  |  | 84 (71-92) |  |
| 32 | -Recurrent diagnosis  -Any diagnostic position  -Aged >80 years |  |  | 75 (58-87) |  |
| 13 | -First diagnosis  -Any diagnostic position  -2010 |  |  | 81 (64-91) |  |
| 14 | -Recurrent diagnosis  -Any diagnostic position  -2010 |  |  | 75 (57-87) |  |
| 50 | -First diagnosis  -Any diagnostic position  -2011 |  |  | 71 (55-83) |  |
| 50 | -Recurrent diagnosis  -Any diagnostic position  -2011 |  |  | 79 (64-89) |  |
| 32 | -First diagnosis  -Any diagnostic position  -2012 |  |  | 77 (58-89) |  |
| 32 | -Recurrent diagnosis  -Any diagnostic position  -2012 |  |  | 73 (56-86) |  |
| Thygesen 201130 | ICD-10 I11.0, I13.0, I13.2, I50 | 50 | -Primary diagnostic position |  |  | 100 (92.9-100) |  | Medium |
| **Primary care EHRs** | | | | | | | | |
| Gini 201697 | unknown | 243 | -ACC / AHA definition |  |  | 55 (49-61) |  | Low |
| Hjerpe 201082 | ICD-10 I50 | unknown |  | 66 (58-73)e |  |  |  | Medium |
| Valk 201694 | ICPC K77 | 683 | -ESC definite |  |  | 63.5 (59.9-67.1) |  | High |
| Van Doorn 201795 | ICPC K77 | unknown | -Study specific definition | 54.5 | 95.7 | 83.3 | 84.3 | Medium |
| Van Staa 199446 | unknown | 31 |  | 100.0 |  | 100.0 |  | Medium |
| Verdú-Rotellar 201796 | ICD-10 I50 | 595 | -Study specific definition |  |  | 53.6 (50.0-57.6)b,c |  | High |

**B. Acute coronary syndrome**

| **Author, year** | **Diagnostic code(s)** | **Records assesseda** | **Parameters** | **Sensitivity** | **Specificity** | **PPV** | **NPV** | **Quality of study** |
| --- | --- | --- | --- | --- | --- | --- | --- | --- |
| **Acute coronary syndrome – secondary care EHRs** | | | | | | | | |
| Bezin 201576 | ICD-10 I20.0, I21-I22, I24 | 100 | -ESC definition  -Primary diagnostic position |  |  | 84.2 (72.1-92.5) |  | High |
| ICD-10 I20.0, I24 |  |  | 70.6 (44.0-89.7) |  |
| ICD-10 I21, I24 |  |  | 90.5 (77.4–97.3) |  |
| ICD-10 I20.0, I21 |  |  | 83.6 (71.2–92.2) |  |
| Bork 200722 | ICD-10 I20.0, I21- I22 | 494 | -ESC definite  -First diagnosis  -Any diagnostic position |  |  | 86.6 (83.3-89.5) |  | High |
| -ESC definite or possible  -First diagnosis  -Any diagnostic position |  |  | 87.8 (84.6-90.6) |  |
| 316 | -ESC definite  -First diagnosis  -Any diagnostic position  -Men |  |  | 87.6 (83.5-91.1) |  |
| -ESC definite or possible  -First diagnosis  -Any diagnostic position  -Men |  |  | 88.9 (84.9-92.2) |  |
| 178 | -ESC definite  -First diagnosis  -Any diagnostic position  -Women |  |  | 84.8 (78.7-89.8) |  |
| -ESC definite or possible  -First diagnosis  -Any diagnostic position  -Women |  |  | 86.0 (80.0-90.7) |  |
| 398 | -ESC definite  -First diagnosis  -Primary diagnostic position |  |  | 90.2 (86.8-92.9) |  |
| -ESC definite or possible  -First diagnosis  -Primary diagnostic position |  |  | 91.5 (88.3-94.0) |  |
| 96 | -ESC definite  -First diagnosis  -Secondary diagnostic position |  |  | 71.9 (61.8-80.6) |  |
| -ESC definite or possible  -First diagnosis  -Secondary diagnostic position |  |  | 72.9 (62.9-81.5) |  |
| Joensen 200937 | ICD-8 410, 427.27; ICD-10 I20.0, I21, I46 | 1,558 | -AHA & ESC definitions  -Any diagnostic position |  |  | 65.5 (63.1-67.9) |  | Medium |
| 1,067 | -AHA & ESC definitions  -Any diagnostic position  -Men |  |  | 72.6 (69.9-75.3) |  |
| 491 | -AHA & ESC definitions  -Any diagnostic position  -Women |  |  | 50.1 (45.6-54.6) |  |
| 1,425 | -AHA & ESC definitions  -Primary diagnostic position |  |  | 67.1 (64.6-69.5) |  |
| 115 | -AHA & ESC definitions  -Secondary diagnostic position |  |  | 47.0 (37.6-56.5) |  |
| Pajunen 200568 | ICD-9 410, 411.0; ICD-10 I20.0, I21-I22 | 2,727 | -Any diagnostic position  -Men  -Aged 35-74 years  -1988-1992 | 67 |  | 86 |  | High |
| 4,715 | -Any diagnostic position  -Men  -Aged 35-74 years  -1993-1997 | 83 |  | 71 |  |
| 3,493 | -Any diagnostic position  -Men  -Aged 35-74 years  -1998-2002 | 87 |  | 76 |  |
| 1,020 | -Any diagnostic position  -Women  -Aged 35-74 years  -1988-1992 | 66 |  | 80 |  |
| 2,880 | -Any diagnostic position  - Women  -Aged 35-74 years  -1993-1997 | 79 |  | 63 |  |
| 1,921 | -Any diagnostic position  - Women  -Aged 35-74 years  -1998-2002 | 84 |  | 69 |  |
| 1,451 | -Any diagnostic position  -Men  -Aged ≥75 years  -1993-1997 | 77 |  | 72 |  |
| 1,544 | -Any diagnostic position  -Men  -Aged ≥75 years  -1998-2002 | 82 |  | 78 |  |
| 3,313 | -Any diagnostic position  -Women  -Aged ≥75 years  -1993-1997 | 71 |  | 69 |  |
| 3,156 | -Any diagnostic position  -Women  -Aged ≥75 years  -1998-2002 | 80 |  | 76 |  |
| **Acute myocardial infarction – secondary care EHRs** | | | | | | | | |
| Barchielli 201275 | ICD-9-CM 410 | 372 | -AHA definite  -Primary diagnostic position |  |  | 86.0 (82.4-89.6) |  | High |
| -AHA definite & probable  -Primary diagnostic position |  |  | 87.3 (84.0-90.8) |  |
| -AHA definite, probable & possible  -Primary diagnostic position |  |  | 94.6 (92.3-96.9) |  |
| -MONICA definite  -Primary diagnostic position |  |  | 52.7 (47.6-57.8) |  |
| -MONICA definite & possible  -Primary diagnostic position |  |  | 65.3 (60.5-70.2) |  |
| Bernal 201998 | ICD-9-CM 410.*1 | 12 | -Primary diagnostic position | 91.9 (90.2-93.5) | 92.6 (90.0-95.1) | 96.8 (95.7-97.9) | 82.2 (78.8-85.7) | High |
| Bezin 201576 | ICD-10 I21 | unknown (100 for all included codes) | -ESC definition  -Primary diagnostic position |  |  | 85.0 (70.2-94.3) |  | High |
| Coloma 201323 | ICD-10 I21 | 148 | -Universal (v1) & AHA definitions |  |  | 100.0 |  | High |
| Dalsgaard 201932 | ICD-10 I21-I24 | 69 | -Study definition  -First diagnosis |  |  | 75 (64-84) |  | High |
| Unknown | -Study definition  -First diagnosis  -Men |  |  | 71 |  |
| -Study definition  -First diagnosis  -Women |  |  | 88 |  |
| Donnan 200350 | ICD-9 410 | 207 | -Adapted MONICA definition | 59 (52-66) |  | 95 (91-100) |  | High |
| Egholm 201634 | ICD-10 I21 | 285 | -Universal definition (v3)  -Any diagnostic position  -All inpatients | 95.2 (92.2-97.3) | 93.4 (92.7-94.0) | 41.7 (37.9-45.7) | 99.7 (99.6-99.9) | High |
| Unknown | -Universal definition (v3)  -Any diagnostic position  -Acute admissions | 93.9 (90.6-96.3) | 98.3 (97.9-98.6) | 73.4 (68.6-77.8) | 99.7 (99.5-99.8) |
| -Universal definition (v3)  -Primary diagnostic position  -All inpatients | 85.0 (80.5-88.8) | 98.2 (97.8-98.5) | 70.4 (65.4-75.1) | 99.2 (99.0-99.4) |
| -Universal defined (v3)  -Primary diagnostic position  -Acute admissions | 82.1 (77.3-86.3) | 99.0 (98.7-99.2) | 81.0 (76.1-85.2) | 99.1 (98.8-99.3) |
| -Universal definition (v3)  -Any diagnostic position  -Acute admissions  -Men | 94.7 (91.0-97.1) | 98.3 (97.9-98.7) | 74.2 (68.7-79.2) | 99.7 (99.5-99.9) |
| -Universal definition (v3)  -Any diagnostic position  -Acute admissions  -Women | 91.7 (83.6-96.4) | 98.0 (97.2-98.7) | 71.0 (61.2-79.4) | 99.6 (99.1-99.8) |
| -Universal definition (v3)  -Any diagnostic position  -Acute admissions  -Aged ≤65 years | 95.7 (90.8-98.3) | 98.3 (97.7-98.7) | 70.7 (63.3-77.4) | 99.8 (99.6-99.9) |
| -Universal definition (v3)  -Any diagnostic position  -Acute admissions  -Aged >65 years | 92.6 (87.9-95.9) | 98.2 (97.7-98.7) | 75.5 (69.2-81.1) | 99.6 (99.3-99.8) |
| Hammar 199480 | ICD-8 unknown codes | 512 | -Study defined definite or possible  -2 separate cities |  |  | 81.2 (75.7-85.7)b,c  77.8 (70.6-83.6)b,c |  | Low |
| Unknown | -Study defined definite |  |  | 77.5 (72.8-81.5)b,c |  |
| Hammar 200158 | ICD-9 410 | 750 | -Nationally defined definite | 94.3 (92.2-95.8)c |  | 85.8 (83.1-88.2)c |  | Medium |
| Heliövaara 198481 | ICD-8 410 | 75 | -MONICA definite | 84.7 (75.6-90.8)c |  |  |  | Medium |
| Herrett 201353 | ICD-10 I21-I23 | 7,489 | -Universal definition (v3) |  |  | 91.5 (90.8-92.1) |  | High |
| Joensen 200937 | ICD-8, presume 410; ICD-10 presume I21 | 1,072 | -AHA & ESC definition  -First diagnosis |  |  | 81.9 (79.5-84.2) |  | Medium |
| Joensuu 199284 | ICD-8 410 | 671 | -MONICA definite & possible  -First diagnosis |  |  | 81.4 (78.2-84.1)c |  | Medium |
| -‘Normal clinical’ definition  -First diagnosis |  |  | 89.1 (86.5-91.3)c |  |
| Lindblad 199387 | ICD-8 410.00, 410.99; ICD-9 410 | 413 | -Study defined definite |  |  | 95.7 (93.2-97.2)c |  | High |
| Madsen 199026 | ICD-8 410-414 | 7,197 | -WHO definition  -Any diagnostic position  -Registry reference standard |  |  | 80.0 (79.1-80.9)b,c |  | High |
| 692 (EHR), 457 (RS) | -WHO definition  -Any diagnostic position  -Medical record review reference standard | 90.4 (87.3-92.7)c,d |  | 59.7 (56.0-63.3)b,c |  |
| 6,108 | -WHO definition  -Primary diagnostic position  -Registry reference standard |  |  | 88.7 (87.9-89.5)b,c |  |
| 1,089 | -WHO definition  -Secondary diagnostic position  -Registry reference standard |  |  | 31.1 (28.4-33.9)b,c |  |
| 538 | -WHO definition  -Primary diagnostic position  -Medical record review reference standard |  |  | 66.7 (62.6-70.6)b,c |  |
| 154 | -WHO definition  -Secondary diagnostic position  -Medical record review reference standard |  |  | 35.1 (28.0-42.9)b,c |  |
| Madsen 200327 | ICD-8 410, 427.24, 427.27, 427.91 & 427.97 | 5,511 | -MONICA definite  -Non-fatal  -Any diagnostic position | 96.6 |  | 78.8 (77.6-79.9)c |  | Medium |
| 4,956 | -MONICA definite  -Non-fatal  -Primary diagnostic position | 92.9 |  | 79.9 (78.7-81.0)c |  |
| Mähönen 199799 | ICD-8 410 | 18,288 in total | -MONICA definite  -Men | 84.4 (83.2-86.3) |  | 79.5 (77.8-81.1) |  | High |
| -MONICA definite  -Women | 85.5 (82.3-88.7) |  | 72.5 (68.8-76.2) |  |
| -MONICA definite & possible  -Men | 72.0 (70.5-73.5) |  | 90.7 (89.6-91.8) |  |
| -MONICA definite & possible  -Women | 62.2 (59.2-65.3) |  | 87.5 (85.0-90.0) |  |
| ICD-8 410, 411 | -MONICA definite & possible  -Men | 72.9 (71.5-74.2) |  | 85.4 (84.3-86.5) |  |
| -MONICA definite & possible  -Women | 66.6 (64.2-69.1) |  | 80.5 (78.3-82.8) |  |
| ICD-9 410 | -MONICA definite  -Men | 86.0 (84.4-87.6) |  | 85.9 (84.2-87.5) |  |
| -MONICA definite  -Women | 81.3 (77.6-85.0) |  | 80.7 (77.0-84.4) |  |
| -MONICA definite & possible  Men | 66.8 (65.1-68.5) |  | 93.3 (92.3-94.4) |  |
| -MONICA definite & possible  -Women | 55.9 (52.6-59.2) |  | 89.6 (87.1-92.2) |  |
| ICD-9 410, 411 | -MONICA definite & possible  -Men | 79.6 (78.3-80.9) |  | 84.8 (83.6-85.9) |  |
| -MONICA definite & possible  -Women | 73.9 (71.4-76.3) |  | 79.0 (76.6-81.3) |  |
| McAlpine 199842 | ICD-9 410 | 204 | -Definite & possible | 67 | 100 | 100 |  | High |
| ICD-9 411 | 5.6 | 99 | 50 |  |
| Merry 200965 | ICD-9 410 | 656 (EHR), 815 (RS) |  | 84 (81-87) |  | 97 (96-99) |  | High |
| Unknown | -Aged <50 years | 86 (80-93) |  | 99 (97-100) |  |
| -Aged ≥50 years | 83 (80-87) |  | 97 (95-99) |  |
| -1987-1995 | 82 (76-87) |  | 94 (91-98) |  |
| -1996-2003 | 85 (81-89) |  | 99 (97-100) |  |
| Nilsson 199488 | ICD-8 410 | 900 | -Primary diagnostic position | 92.3 (79.7-97.3)c,d |  | 100.02 |  | High |
| Pajunen 200568 | ICD-9 410; ICD-10 I21-I22 | 2,727 | -Any diagnostic position  -Men  -Aged 35-74 years  -1988-1992 | 64 |  | 93 |  | High |
| 4,715 | -Any diagnostic position  -Men  -Aged 35-74 years  -1993-1997 | 78 |  | 86 |  |
| 3,493 | -Any diagnostic position  -Men  -Aged 35-74 years  -1998-2002 | 81 |  | 90 |  |
| 1,020 | -Any diagnostic position  -Women  -Aged 35-74 years  -1988-1992 | 61 |  | 88 |  |
| 2,880 | -Any diagnostic position  - Women  -Aged 35-74 years  -1993-1997 | 75 |  | 79 |  |
| 1,921 | -Any diagnostic position  -Women  -Aged 35-74 years  -1998-2002 | 78 |  | 86 |  |
| 1,451 | -Any diagnostic position  -Men  -Aged ≥75 years  -1993-1997 | 73 |  | 85 |  |
| 1,544 | -Any diagnostic position  -Men  -Aged ≥75 years  -1998-2002 | 78 |  | 90 |  |
| 3,313 | -Any diagnostic position  -Women  -Aged ≥75 years  -1993-1997 | 69 |  | 80 |  |
| 3,156 | -Any diagnostic position  -Women  -Aged ≥75 years  -1998-2002 | 76 |  | 87 |  |
| Palomäki 1994100 | ICD-9 4100, 4109 | 734 | -MONICA definite |  |  | 71.0 (67.6-74.1)b,c |  | High |
| -MONICA definite & possible |  |  | 93.5 (91.4-95.0)b,c |  |
| -FINMONICA definite |  |  | 71.0 (67.6-74.1)b,c |  |
| -FINMONICA definite & possible |  |  | 92.0 (89.8-93.7)b,c |  |
| ICD-9 4100 | 566 | -MONICA definite |  |  | 86.4 (83.3-89.0)b,c |  |
| -FINMONICA definite |  |  | 86.4 (83.3-89.0)b,c |  |
| Pietilä 199769 | ICD-8 410,00, 410,99 | 211 | -Definite & possible |  |  | 96.6 (90.3-98.8)b,c |  | High |
|  | -Definite |  |  | 93.1 (85.8-96.8)b,c |  |
| ICD-9 4100 | 178 | -Definite & possible |  |  | 95.0 (86.3-98.2)b,c |  |
|  | -Definite |  |  | 88.3 (77.8-94.2)b,c |  |
| Rapola 199770 | ICD-8 410.00, 410.07, 410.97, 410.99; ICD-9 4100, 4109 | 217 | -MONICA definite & possible |  |  | 93.5 (89.5-96.1)3 |  | High |
| -MONICA definite |  |  | 77.9 (71.9-82.9)3 |  |
| 105 | -MONICA definite & possible  -Aged <60 years |  |  | 96.2 (90.1-98.5) |  |
| -MONICA definite  -Aged <60 years |  |  | 80.0 (71.4-86.5) |  |
| 112 | -MONICA definite & possible  -Aged ≥60 years |  |  | 91.1 (84.3-95.1) |  |
| -MONICA definit  -Aged ≥60 years |  |  | 75.9 (67.2-82.9) |  |
| Sundbøll 201629 | ICD-10 I21 | 99 | -First diagnosis  -Any diagnostic position |  |  | 97 (91-99) |  | High |
| 100 | -Recurrent diagnosis  -Any diagnostic position |  |  | 88 (80-93) |  |
| 63 | -First diagnosis  -Any diagnostic position  -Men |  |  | 97 (89-99) |  |
| 36 | -First diagnosis  -Any diagnostic position  -Women |  |  | 97 (86-100) |  |
| 69 | -Recurrent diagnosis  -Any diagnostic position  -Men |  |  | 88 (79-94) |  |
| 31 | -Recurrent diagnosis  -Any diagnostic position  -Women |  |  | 88 (71-95) |  |
| 30 | -First diagnosis  -Any diagnostic position  -Aged <60 years |  |  | 97 (83-99) |  |
| 48 | -First diagnosis  -Any diagnostic position  -Aged 60-80 years |  |  | 98 (89-100) |  |
| 21 | -First diagnosis  -Any diagnostic position  -Aged >80 years |  |  | 95 (77-99) |  |
| 19 | -Recurrent diagnosis  -Any diagnostic position  -Aged <60 years |  |  | 89 (69-97) |  |
| 57 | -Recurrent diagnosis  -Any diagnostic position  -Aged 60-80 years |  |  | 89 (79-95) |  |
| 24 | -Recurrent diagnosis  -Any diagnostic position  -Aged >80 years |  |  | 83 (64-93) |  |
| 35 | -First diagnosis  -Any diagnostic position  -2010 |  |  | 97 (85-99) |  |
| 29 | -First diagnosis  -Any diagnostic position  -2011 |  |  | 97 (83-99) |  |
| 35 | -First diagnosis  -Any diagnostic position  -2012 |  |  | 97 (85-99) |  |
| 33 | -Recurrent diagnosis  -Any diagnostic position  -2010 |  |  | 85 (69-93) |  |
| 38 | -Recurrent diagnosis  -Any diagnostic position  -2011 |  |  | 92 (79-97) |  |
| 29 | -Recurrent diagnosis  -Any diagnostic position  -2012 |  |  | 86 (69-95) |  |
| 89 | -First diagnosis  -Primary diagnostic position |  |  | 99 (94-100) |  |
| 10 | -First diagnosis  -Secondary diagnostic position |  |  | 80 (49-94) |  |
| Thygesen 201130 | ICD-10 I21-I23 | 50 | -Primary diagnostic position |  |  | 98.0 (89.4-99.9) |  | Medium |
| Wright 201247 | ICD-10 I21-I22 | 130 |  |  |  | 89.2 (82.7-93.5)c |  | High |
| **Unstable angina – secondary care EHRs** | | | | | | | | |
| Bezin 201576 | ICD-10 I20.0 | unknown (100 for all included codes) | -ESC definition  -Primary diagnostic position |  |  | 20.0 (4.3-48.1) |  | High |
| Joensen 200937 | ICD-8 code unclear; ICD-10 presume I20.0 | 444 | -AHA & ESC definition |  |  | 27.5 (23.4-31.9) |  | Medium |
| Merry 200965 | ICD-9 411.1, 413.1 | 656 (EHR), 815 (RS) |  | 53 (48-58) |  | 78 (74-83) |  | High |
| Unknown | -Aged <50 years | 54 (41-67) |  | 76 (62–89) |  |
| -Aged ≥50 years | 53 (48-59) |  | 79 (74-84) |  |
| -1987-1995 | 53 (44-63) |  | 69 (59-79) |  |
| -1996-2003 | 53 (48-59) |  | 83 (77-88) |  |
| Sundbøll 201629 | ICD-10 I20.0 | 96 | -Any diagnostic position |  |  | 88 (79-93) |  | High |
| 55 | -Any diagnostic position  -Men |  |  | 87 (76-94) |  |
| 41 | -Any diagnostic position  -Women |  |  | 88 (74-95) |  |
| 28 | -Any diagnostic position  -Aged <60 years |  |  | 86 (69-94) |  |
| 57 | -Any diagnostic position  -Aged 60-80 years |  |  | 89 (79-95) |  |
| 11 | -Any diagnostic position  -Aged >80 years |  |  | 82 (52-95) |  |
| 29 | -Any diagnostic position  -2010 |  |  | 90 (74-96) |  |
| 36 | -Any diagnostic position  -2011 |  |  | 86 (71-94) |  |
| 31 | -Any diagnostic position  -2012 |  |  | 87 (71-95) |  |
| 90 | -Primary diagnostic position |  |  | 89 (81-94) |  |
| 6 | -Secondary diagnostic position |  |  | 67 (30-90) |  |
| **Cardiac arrest – secondary care EHRs** | | | | | | | | |
| Joensen 200937 | ICD-8 presume 427.27; ICD-10 presume I46 | 42 | -AHA & ESC definition |  |  | 50.0 (34.2-65.8) |  | Medium |
| **Acute myocardial infarction – primary care EHRs** | | | | | | | | |
| Coloma 201323 | ICPC K75 | 124 | -Universal (v1) & AHA definition |  |  | 75.0 (67.4-82.6) |  | High |
| ICD9-CM 410 | 116 |  |  | 96.6 (93.2-99.9) |  |
| Donnan 200350 | Read | 207 | -Adapted MONICA definition | 83 (71-96) |  | 91 (83-99) |  | High |
| Hammad 200852 | Read/OMIS | 217 |  |  |  | 93 (90-96) |  | Medium |
| Herrett 201353 | Read | 7,224 | -Universal definition (v3) |  |  | 92.2 (91.6-92.8) |  | High |
| Van Staa 199446 | Unknown | 34 |  | 89.3 |  | 85.3 |  | Medium |

**C. Stroke**

| **Author, year** | **Diagnostic code(s)** | **Records assesseda** | **Parameters** | **Sensitivity** | **Specificity** | **PPV** | **NPV** | **Quality of study** |
| --- | --- | --- | --- | --- | --- | --- | --- | --- |
| **Stroke – secondary care EHRs** | | | | | | | | |
| Aboa-Eboulé 2013101 | ICD-10 I61, I63, I64, G46 | 903 (EHR), 811 (RS) | -WHO definition  -First or recurrent diagnosis  -Primary diagnostic position | 77.1 (74.2-80.0) |  | 69.2 (66.1-72.2) |  | High |
| 230 (EHR), 201 (RS) | -WHO definition  -First or recurrent diagnosis  -Primary diagnostic position -Aged <70 years | 70.6 (64.0-76.5)c |  | 61.9 (55.3-67.8)c |  |
| 673 (EHR), 610 (RS) | -WHO definition  -First or recurrent diagnosis  -Primary diagnostic position -Aged ≥70 years | 79.2 (75.8-82.2)c |  | 71.7 (68.3-75.0)c |  |
| 399 (EHR), 359 (RS) | -WHO definition  -First or recurrent diagnosis  -Primary diagnostic position -Men | 74.7 (69.9-78.9)c |  | 67.2 (62.4-71.6)c |  |
| 504 (EHR), 452 (RS) | -WHO definition  -First or recurrent diagnosis  -Primary diagnostic position -Women | 79.0 (75.0-82.5)c |  | 70.8 (66.7-74.6)c |  |
| 136 (EHR), 107 (RS) | -WHO definition  -First or recurrent diagnosis  -Primary diagnostic position -2004 | 80.3 (72.6-86.3)c |  | 52.8 (45.8-59.8)c,i |  |
| 178 (EHR), 192 (RS) | -WHO definition  -First or recurrent diagnosis  -Primary diagnostic position -2005 | 75.5 (68.0-81.8)c |  | 62.7 (55.4-69.5)c,i |  |
| 232 (EHR), 254 (RS) | -WHO definition  -First or recurrent diagnosis  -Primary diagnostic position -2006 | 70.7 (63.4-77.2)c |  | 74.7 (67.5-81.0)c |  |
| 132 (EHR), 164 (RS) | -WHO definition  -First or recurrent diagnosis  -Primary diagnostic position -2007 | 76.0 (69.5-81.5)c |  | 75.6 (69.1-81.2)c,i |  |
| 177 (EHR), 94 (RS) | -WHO definition  -First or recurrent diagnosis  -Primary diagnostic position -2008 | 82.9 (76.7-87.7)c |  | 81.2 (74.8-86.1)c |  |
| Appelros 201171 | ICD-10 I61, I63, I64 | 328 (EHR), 377 (RS) | -WHO definition  -First diagnosis | 89.1 (85.4-91.9)c,d |  | 97.0 (94.5-98.3)b,c |  | Low |
| Barer 199640 | ICD-9 431, 433-4, 436 | 340 (EHR), 420 (RS) |  | 66.2 (61.5-70.5)c,d |  | 81.8 (77.3-85.5)b,c |  | Low |
| Bernal 201998 | ICD-9-CM 094.87, 430-4346, 436 | 12 (EHR),  15 (RS) | -Primary diagnostic position | 66.7 (39.5-93.9) | 99.9 (99.7-100.0) | 83.3 (58.1-100.0) | 99.7 (99.4-100.0) | High |
| Dalsgaard 201932 | ICD-10 I61–I65 | 46 | -Study definition  -First diagnosis |  |  | 70 (54-80) |  | High |
| Unknown | -Study definition  -First diagnosis  -Men |  |  | 75 |  |
| -Study definition  -First diagnosis  -Women |  |  | 61 |  |
| Davenport 199649 | ICD-9 431, 432.9, 433, 434, 436, 438 | 557 (EHR), 613 (RS) | -Primary diagnostic position | 86.3 (83.3-88.8)c | 99.9 (99.9-99.9)c | 95.0 (92.8-96.5)b,c | 99.9 (99.9-99.9)c,g | Medium |
| Ellekjaer 1999102 | ICD-9 430, 431, 434, 436 | 508 (EHR), 389 (RS) | -WHO definition | 89.2 (85.7-91.9)c |  | 68.3 (64.1-72.2) |  | High |
| Frost 200735 | ICD-8 430-434, 436; ICD-10 I60-I64 | 164 | -WHO definition |  |  | 97.0 (93.0-98.7)c |  | Medium |
| Heliövaara 198481 | ICD-8 430-434 | 59 (EHR), 78 (RS) | WHO definite | 81.7 (70.1-89.4)c |  | 83.1 (71.5-90.5)b,c |  | Medium |
| Holmqvist 201260 | ICD-10 I61, I63 | 76 | -MONICA definition  -RA patients |  |  | 92 |  | High |
| -MONICA definition  -Patients without RA |  |  | 89 |  |
| Johnsen 200238 | ICD-10 I60, I61, I63, I64 | 377 | -WHO definition |  |  | 79.3 (74.9-83.3) |  | High |
| Kivimäki 201756 | ICD-9 430, 431, 434, 436; ICD-10 I60, I61, I63, I64 | 107 (EHR), 7,837 (RS) | -MONICA definition  -First or recurrent diagnosis -Any diagnostic position | 71 (62-79) | 100 (100-100) | 79 (70-86) | 100 (99-100) | High |
| 44 (EHR), 5,475 (RS) | -MONICA definition  -First or recurrent diagnosis -Any diagnostic position  -Aged <60 years | 64 (49-77) | 100 (100-100) | 73 (57-86) | 100 (100-100) |
| 66 (EHR), 2,362 (RS) | -MONICA definition  -First or recurrent diagnosis -Any diagnostic position  -Aged ≥60 years | 76 (65-85) | 100 (99-100) | 82 (70-90) | 99 (99-100) |
| 76 (EHR), 5,455 (RS) | -MONICA definition  -First or recurrent diagnosis -Any diagnostic position  -Men | 70 (59-80) | 100 (100-100) | 80 (70-89) | 100 (99-100) |
| 31 (EHR), 2,382 (RS) | -MONICA definition  -First or recurrent diagnosis  -Any diagnostic position  -Women | 74 (55-88) | 100 (99-100) | 74 (55-88) | 100 (99-100) |
| Köster 201364 | ICD-10 I61, I63, I64 | 2,032 (EHR), 2,166 (RS) | -MONICA definite & possible  -First or recurrent diagnosis | 89.3 (87.9-90.7) |  | 80.5 (78.8-82.2) |  | High |
| -MONICA definite, possible & unclassifiable  -First or recurrent diagnosis | 82.7 (81.1-84.3) |  | 88.1 (86.7-89.5) |  |
| 1,426 (EHR), 1,468 (RS) | -MONICA definite & possible  -First diagnosis | 90.6 (89.0-92.2) |  | 85.8 (84.0-87.6) |  |
| -MONICA definite, possible & unclassifiable  -First diagnosis | 85.9 (84.2-87.6) |  | 94.0 (92.8-95.2) |  |
| Krarup 200739 | ICD-10 I60, I61, I63, I64 | 236 | -WHO definition  -2 separate medical record reviewers |  |  | 80.5 (73.6-86.3) & 86.0 (79.7-90.9) |  | High |
| Leone 200486 | ICD-9 430, 431, 434, 436 | 411 (EHR), 698 (RS) | -WHO definition  -Any diagnostic position | 53.2 (49.4-56.8)c |  | 90.3 (87.0-92.8)b,c |  | High |
| Leppälä 199972 | ICD-8 430, 431h, 432, 433, 434, 436; ICD-9 430, 431, 433, 434, 436 | 326 | -MONICA & nationally defined definite & probable |  |  | 89.9 (86.1-92.7)c |  | High |
| Lindblad 199387 | ICD-8 & ICD-9 430-434, 436 | 251 | -Study defined definite |  |  | 94.0 (90.4-96.3)c |  | High |
| Lühdorf 201725 | ICD-10 I60, I61, I63, I64 | 3,326 | -WHO definition  -Any diagnostic position |  |  | 69.3 (67.8-70.9) |  | High |
| Unknown | -WHO definition  -Any diagnostic position  -Men |  |  | 71.1 (69.1-73.1) |  |
| -WHO definition  -Any diagnostic position  -Women |  |  | 66.8 (64.3-69.3) |  |
| -WHO definition  -Any diagnostic position  -1994-1999 |  |  | 75.1 (71.6-78.7) |  |
| -WHO definition  -Any diagnostic position  -2000-2004 |  |  | 70.2 (67.7-72.7) |  |
| -WHO definition  -Any diagnostic position  -2005-2009 |  |  | 66.3 (63.9-68.7) |  |
| Rodrigo-Rincon 201591 | ICD-9-CM 997.0X, 431-434.9X, 436, 346.XX, 430 | 6 (EHR),  10 (RS) |  | 33.3 |  | 20.0 |  | Low |
| Sansom 201545 | ICD-10 I60-I64 | 502 (EHR), 664 (RS) |  | 75.6 (72.2-78.8) |  | 96.3 (94.4-97.8) |  | Low |
| Sedova 201592 | ICD-10 I60, I61, I63, I64 | 484 | -WHO definition |  |  | 85 (81-88) |  | High |
| ICD-10 I60, I61, I63 | Unknown |  |  | 90 (87-93) |  |
| Stegmayr 199266 | ICD-9 presume 430-434, 436 | 5,101 (EHR), 3,606 (RS) | -WHO definition |  |  | 68.5 (67.2-69.7)2,3 |  | Medium |
| Tolonen 200773 | ICD-9 430-434, 436-438; ICD-10 I60-I69 | 2,866 | -First diagnosis  -Primary diagnostic position | 85 (84-86) |  | 85 (84-86) |  | High |
| Varmdal 201663 | ICD-10 I61, I63, I64 | 5,192 | -WHO definition  -Any diagnostic position | 96.8 (95.7-97.9) | 99.6 (99.6-99.7) | 79.7 (77.5-82.0) | 99.9 (99.9-100.0) | High |
|  | -WHO definition  -Primary diagnostic position | 86.1 (84.0-88.3) | 99.9 (99.9-99.9) | 93.5 (92.0-95.1) | 99.7 (99.7-99.8) |
| Wildenschild 201431 | ICD-10 I61, I63, I64 | 25 | -WHO definition |  |  | 20 (9-39) |  | High |
| 10,000 (EHR), 10,015 (RS) | -WHO definition  -Extrapolated results | 79 (73-84) |  | 79 (62-88) |  |
| 156 | -WHO definition  -Possible stroke patients | 58 (46-69) | 96 (90-99) | 93 (82-99) | 72 (62-80) |
| **Ischaemic stroke – secondary care EHRs** | | | | | | | | |
| Aboa-Eboulé 2013101 | presume ICD-10 I63 | 178 (EHR), 192 (RS) | -WHO definition  -First or recurrent diagnosis  -Primary diagnostic position  -Cardiac embolism ischaemic stroke | 83.3 (77.4-87.9)c |  | 89.9 (84.6-93.5)c,i |  | High |
| 232 (EHR), 254 (RS) | -WHO definition  -First or recurrent diagnosis  -Primary diagnostic position  -Large-artery atherosclerosis | 74.0 (68.3-79.0)c |  | 81.0 (75.5-85.6)c,i |  |
| 132 (EHR), 164 (RS) | -WHO definition  -First or recurrent diagnosis  -Primary diagnostic position  -Large-artery lacunar infarct | 73.2 (65.9-79.4)c |  | 90.1 (84.8-94.7)c,i |  |
| 177 (EHR), 77 (RS) | -WHO definition  -First or recurrent diagnosis  -Primary diagnostic position  -Other ischaemic stroke | 67.0 (57.0-75.7)c |  | 35.6 (28.9-42.9)c,i |  |
| Baldereschi 201874 | ICD-9-CM 433*1, 434*1 | 1,002 (EHR), 1,273 (RS) | -MONICA definition  -Primary diagnostic position | 70.5 (68.0-73.0) |  | 89.9 (87.6-91.4) |  | Medium |
| ICD-9-CM 433*1 | 63 |  |  |  | 85.7 (74.6-93.3) |  |
| ICD-9-CM 434*1 | 979 |  |  |  | 89.9 (87.8-91.7) |  |
| Dalsgaard 201932 | ICD-10 I63 | 23 | -Study definition  -First diagnosis |  |  | 78.3 (58.1-90.3)c |  | High |
| Ekker 201957 | ICD-9 433, 434; ICD-10 I63 | 301 | -First diagnosis |  |  | 90.4 (86.5-93.2)c |  | Medium |
| Ellekjaer 1999102 | ICD-9 434 | 313 (EHR), 281 (RS) | -WHO definition | 73.3 (67.8-78.1)c,d |  | 65.8 (60.3-70.8)b,c |  | High |
| Giroud 201578 | ICD-10 I63 | 914 | -First or recurrent diagnosis  -Primary diagnostic position |  |  | 96.3 (94.8-97.3)c |  | High |
| Haesebaert 201379 | ICD-10 I63 | 329 (EHR), 465 (RS) |  | 67.3 (63.1-71.5) |  | 95.1 (92.8-97.4) |  | High |
| Heliövaara 198481 | ICD-8 432-434 | 39 (EHR), 59 (RS) | -WHO definition | 66.1 (53.4-76.9)c |  |  |  | Medium |
| Johnsen 200238 | ICD-10 I63 | 113 | -WHO definition |  |  | 87.6 (80.3-92.5)b,c |  | High |
| Krarup 200739 | presume ICD-10 I63 | 33 | -WHO definition  -2 separate medical record reviewers |  |  | 97.0 (84.2–99.9)  100.0 |  | High |
| Leone 200486 | ICD-9 434 | 202(EHR), 478 (RS) | -WHO definition  -Any diagnostic position | 36.8 (32.6-41.2)c |  | 87.1 (81.8-91.1)c |  | High |
| 188 (EHR), 478 (RS) | -WHO definition  -Primary diagnostic position | 35.4 (31.2-39.7)c |  | 89.9 (84.8-93.4)c |  |
| Leppälä 199972 | ICD-8 432, 433, 434; ICD-9 433, 434 | 252 (EHR), 258 (RS) | -MONICA & nationally defined definite & probable stroke |  |  | 90.1 (85.8-93.2)c |  | High |
| Lühdorf 201725 | ICD-10 I63 | Unknown | -WHO definition  -Any diagnostic positions |  |  | 80.1 (77.9-82.3) |  | High |
|  | -WHO definition  -Primary diagnostic position |  |  | 81.0 (78.6-83.4) |  |
| Rinaldi 200390 | ICD-9 434, 436 | 180 (EHR), 157 (RS) | -WHO definition  -Any diagnostic positions | 81.5 (74.7-86.2)c |  | 71.1 (64.0-77.2)c |  | High |
| 157 (EHR), 157 (RS) | -WHO definition  -Primary diagnostic position | 75.8 (68.5-81.8)c |  | 75.8 (68.5-81.8)c |  |
| ICD-9 434 | 3 | -WHO definition  -Any diagnostic positions |  |  | 100.0 |  |
| ICD-9 436 | 177 |  |  | 70.6 (63.5-76.8)b,c |  |
| Sedova 201592 | ICD-10 I63 | unknown | -WHO definition |  |  | 82 (74-89) |  | High |
| Spolaore 200593 | ICD-9 433 | unknown (4,015 for all included codes) | -MONICA definition  -Primary diagnostic position |  |  | 9 (6-13) |  | High |
| -MONICA definition  -Secondary diagnostic position |  |  | 4 (1-7) |  |
| ICD-9 434 | -MONICA definition  -Primary diagnostic position |  |  | 77 (73-82) |  |
| -MONICA definition  -Secondary diagnostic position |  |  | 29 (22-36) |  |
| Tolonen 200773 | ICD-9 433, 434, 436; ICD-10 I63, I64 | unknown (2,866 for all included codes) | -First diagnosis  -Primary diagnostic position | 82 (80–84) |  | 84 (83–85) |  | High |
| ICD-9 433, 434; ICD-10 I63 | 81 (79–83) |  | 83 (81–85) |  |
| Vila-Corcoles 201462 | ICD-9 433, 434, 436, 437 but later states 434, 435, 436, 437 | 406 | -MONICA definition |  |  | 84.5 (80.6-87.7)b,c |  | High |
| Wright 201247 | ICD-10 I63 | 190 |  |  |  | 86.3 (80.7-90.5)c |  | High |
| **Haemorrhagic stroke including both intracerebral and subarachnoid haemorrhages – secondary care EHRs** | | | | | | | | |
| Dalsgaard 201932 | ICD-10 I60–I62 | 5 | -Study definition  -First diagnosis |  |  | 60.0 (23.1-88.2)c |  | High |
| **Intracerebral haemorrhage – secondary care EHRs** | | | | | | | | |
| Aboa-Eboulé 2013101 | ICD-10 presume I61 | 189 (EHR), 107 (RS) | -WHO definition  -First or recurrent diagnosis  -Primary diagnostic position | 87.9 (80.3-92.8)b |  | 67.6 (59.5-74.8)c,i |  | High |
| Ekker 201957 | ICD-9 431; ICD-10 I61 | 183 | -First diagnosis |  |  | 86.3 (80.6-90.6)c |  | Medium |
| Ellekjaer 1999102 | ICD-9 431 | 56 (EHR), 41 (RS) | -WHO definition | 97.6 (87.4-99.6)c,d |  | 71.4 (58.5-81.6)b,c |  | High |
| Giroud 201578 | ICD-10 I61 | 188 | -First or recurrent diagnosis  -Primary diagnostic position |  |  | 89.4 (84.1-93.0)c |  | High |
| Heliövaara 198481 | ICD-8 431 | 0 (EHR), 4 (RS) | -WHO definition | 0.0 |  |  |  | Medium |
| Johnsen 200238 | ICD-10 I61 | 35 | -WHO definition |  |  | 65.7 (49.2-79.2)b,c |  | High |
| Kirkman 200955 | ICD-10 I61 | 978 | -Primary diagnostic position |  |  | 95.9 (94.5-97.0) |  | Medium |
| 204 | -Primary diagnostic position  -2002 |  |  | 95.1 (91.2-97.3) |  |
| 179 | -Primary diagnostic position  -2003 |  |  | 97.2 (93.6-98.8) |  |
| 170 | -Primary diagnostic position  -2004 |  |  | 95.3 (91.0-97.6) |  |
| 152 | -Primary diagnostic position  -2005 |  |  | 98.0 (94.4-99.3) |  |
| 151 | -Primary diagnostic position  -2006 |  |  | 94.7 (90.0-97.3) |  |
| 122 | -Primary diagnostic position  -2007 |  |  | 95.1 (90.0-97.7) |  |
| Krarup 200739 | presume ICD-10 I61 | 17 | -WHO definition  -2 separate medical record reviewers |  |  | 73.9 (51.6–89.8) |  | High |
| Leone 200486 | ICD-9 431 | 110 (EHR), 138 (RS) | -WHO definition  -Any diagnostic positions | 59.4 (51.1-67.3)c |  | 74.5 (65.7-81.8)c |  | High |
| 102 (EHR), 138 (RS) | -WHO definition  -Primary diagnostic position | 56.5 (48.2-64.5)c |  | 76.5 (67.4-83.6)c |  |
| Leppälä 199972 | ICD-8 431h; ICD-9 431 | 28 (EHR), 26 (RS) | -MONICA & nationally defined definite & probable |  |  | 82.1 (64.4-92.1)c |  | High |
| Lindblad 199387 | presume ICD-8 431; ICD-9 431 | 20 | -Study defined definite |  |  | 55.0 (34.2-74.2)b,c |  | High |
| Lühdorf 201725 | ICD-10 I61 | unknown | -WHO definition  -Any diagnostic positions |  |  | 73.1 (68.1-78.0) |  | High |
| -WHO definition  -Primary diagnostic position |  |  | 76.7 (71.6-81.8) |  |
| Øie 201889 | ICD-10 I61 | 545 | -Primary diagnostic position |  |  | 96.9 (95.1-98.0)c |  | High |
| 143 | -Secondary diagnostic position |  |  | 83.1 (76.4-88.2)c |  |
| Sedova 201592 | ICD-10 I61 | unknown | -WHO definition |  |  | 91 (85-96) |  | High |
| Spolaore 200593 | ICD-9 431 | unknown (4,015 for all included codes) | -WHO-MONICA definition  -Primary diagnostic position |  |  | 78 (74-83) |  | High |
| -WHO-MONICA definition  -Secondary diagnostic position |  |  | 40 (31-49) |  |
| Tolonen 200773 | ICD-9 431; ICD-10 I61 | unknown (2,866 for all included codes) | -First diagnosis  -Primary diagnostic position | 94 (91–97) |  | 84 (80–88) |  | High |
| Wright 201247 | ICD-10 I61, I62 | 69 |  |  |  | 78.3 (67.2-86.4)3 |  | High |
| **Subarachnoid haemorrhage – secondary care EHRs** | | | | | | | | |
| Ellekjaer 1999102 | ICD-9 430 | 13 (EHR), 12 (RS) | -WHO definition | 75.0 (46.8-91.1)3,4 |  | 69.2 (42.4-87.3)2,3 |  | High |
| Gaist 200036 | ICD-8 430; ICD-10 I60 | 191 | -First diagnosis  -Neurosurgery ward |  |  | 93 (85-98) |  | Medium |
| -First diagnosis  -Neurology ward |  |  | 75 (60-87) |  |
| -First diagnosis  -Non-neurosurgery or neurology ward |  |  | 47 (36-59) |  |
| Giroud 201578 | ICD-10 I60 | 72 | -First or recurrent diagnosis  -Primary diagnostic position |  |  | 45.8 (34.8-57.3)2 |  | High |
| Heliövaara 198481 | ICD-8 430 | 13 (EHR), 15 (RS) | -WHO definition | 73.3 (48.0-89.1)3 |  |  |  | Medium |
| Johnsen 200238 | ICD-10 I60 | 29 | -WHO definition |  |  | 48.3 (31.4-65.6)2,3 |  | High |
| Kirkman 200955 | ICD-10 I60 | 1,169 | -Primary diagnostic position |  |  | 96.1 (94.8-97.0) |  | Medium |
| 201 | -Primary diagnostic position  -2002 |  |  | 95.5 (91.7-97.6) |  |
| 198 | -Primary diagnostic position  -2003 |  |  | 95.0 (91.0-97.2) |  |
| 191 | -Primary diagnostic position  -2004 |  |  | 95.8 (92.0-97.9) |  |
| 180 | -Primary diagnostic position  -2005 |  |  | 97.8 (94.4-99.1) |  |
| 198 | -Primary diagnostic position  -2006 |  |  | 95.5 (91.6-97.6) |  |
| 201 | -Primary diagnostic position  -2007 |  |  | 97.0 (93.6-98.6) |  |
| Krarup 200739 | presume ICD-10 I60 | 3 | -WHO definition  -2 separate medical record reviewers |  |  | 66.7 (9.4-99.2) |  | High |
| Leone 200486 | ICD-9 430 | 42 (EHR), 51 (RS) | -WHO definition  -Any diagnostic position | 35.3 (23.6-49.0)c |  | 42.9 (29.1-57.8)c |  | High |
| 37 (EHR), 51 (RS) | -WHO definition  -Primary diagnostic position | 33.3 (22.0-47.0)c |  | 45.9 (31.0-61.6)c |  |
| Leppälä 199972 | ICD-8 430; ICD-9 430 | 28 (EHR), 25 (RS) | -MONICA & nationally defined definite & probable |  |  | 78.6 (60.5-89.8)3 |  | High |
| Lindblad 199387 | presume ICD-8 430; ICD-9 430 | 23 | -Study defined definite |  |  | 78.3 (58.1-90.3)2,3 |  | High |
| Lühdorf 201725 | ICD-10 I60 | unknown | -WHO definition  -Any diagnostic position |  |  | 60.6 (53.3-67.7) |  | High |
| -WHO definition  -Primary diagnostic position |  |  | 62.1 (54.5-69.7) |  |
| Nieuwkamp 201461 | ICD-9 430 | 1,472 | -Primary diagnostic position |  |  | 95.4 (94.2-96.3)c |  | Medium |
| Øie 201889 | ICD-10 I60 | 171 | -Primary diagnostic position |  |  | 95.3 (91.0-97.6)c |  | High |
| 34 | -Secondary diagnostic position |  |  | 55.9 (39.5-71.1)c |  |
| Sedova 201592 | ICD-10 I60 | unknown | -WHO definition |  |  | 91 (85-97) |  | High |
| Spolaore 200593 | ICD-9 430 | unknown (4,015 for all included codes) | -WHO-MONICA definition  -Primary diagnostic position |  |  | 76 (73-79) |  | High |
| -WHO-MONICA definition  -Secondary diagnostic position |  |  | 26 (18-34) |  |
| Tolonen 200773 | ICD-9 430; ICD-10 I60 | unknown (2,866 for all included codes) | -First diagnosis  -Primary diagnostic position | 92 (88–96) |  | 81 (75–87) |  | High |
| Wright 201247 | ICD-10 I60 | 78 |  |  |  | 96.1 (89.3-98.7)c |  | High |
| **Acute stroke – primary care EHRs** | | | | | | | | |
| Cook 201341 | Unknown Read codes | 95 |  |  |  | 90.5 (83.0-94.9)b,c |  | Low |
| Ruigómez 201044 | Read codes | 400 | -Review of computerized record excluding free text (step 1) |  |  | 82.8 (70.6-91.4) |  | High |
| -Review of free text in computerized record (step 2) |  |  | 90.2 (78.6-96.7) |  |
| -Confirmed by GP & medical records (step 3) |  |  | 77.5 (69.2-84.1) |  |
| Zhou 201448 | Unknown Read codes | 1,000 |  |  |  | 89 |  | Low |
| **Haemorrhagic stroke – primary care EHRs** | | | | | | | | |
| Gaist 201351 | 41 different read codes | 306 |  |  |  | 82 (77-86) |  | High |
| **Intracerebral haemorrhage – primary care EHRs** | | | | | | | | |
| Gaist 201351 | 41 different read codes | 150 |  |  |  | 73 (65-80) |  | High |
| **Subarachnoid haemorrhage – primary care EHRs** | | | | | | | | |
| Gaist 201351 | 41 different read codes | 156 |  |  |  | 91 (85-95) |  | High |

a EHR unless otherwise stated; b positive predictive value calculated from raw data: TP/(TP+FP); c confidence interval calculated from raw data; d sensitivity calculated from raw data: TP/(TP+FN); e mean sensitivity calculated from results of each primary care centre; f 432 included codes ended in .0, .1 or .9, 433 included codes ended in .01, .11, .21, .31, .81 or .91, and 434 included codes ended in .01, .11 or .91; g negative predictive value calculated from raw data: TN/(FN+TN); h 431 included codes ended in .00, .08, .09, .98, .99; i PPV presented in paper is different but based on numbers presented this would be correct percentage

EHR, electronic health record; RS, reference standard

| Main study result(s) highlighted in blue |
| --- |

# **S3 Table. QUADAS-2 assessment of studies**

|  |  | **Patient selection** | | | | **Index test** | | **Reference standard** | | | | | | | | | **Flow and timing** | | | | | **Overall quality** |
| --- | --- | --- | --- | --- | --- | --- | --- | --- | --- | --- | --- | --- | --- | --- | --- | --- | --- | --- | --- | --- | --- | --- |
|  |  | 1 | 2 | 3 | 4 | 1 | 2 | 1 | | 2 | 3 | | 4 | | 5 | | 1 | | 2 | | 3 |
| Aboa-Eboulé 2013101 | Response | Y | Y | Y | Y | Y | Y | Y | | Y | U | | Y | | Y | | Y | | Y | | Y | HIGH |
| Risk | **Low** | | | | **Low** | | **Low** | | | | | | | | | **Low** | | | | |
| Appelros 201171 | Response | Y | Y | Y | Y | Y | N | Y | | N | N | | Y | | Y | | Y | | Y | | Y | LOW |
| Risk | **Low** | | | | **High** | | **High** | | | | | | | | | **Low** | | | | |
| Baldereschi 201874 | Response | Y | Y | Y | Y | Y | Y | U | | U | N | | Y | | Y | | Y | | Y | | Y | MEDIUM |
| Risk | **Low** | | | | **Low** | | **High** | | | | | | | | | **Low** | | | | |
| Barchielli 201275 | Response | Y | Y | Y | Y | Y | Y | Y | | U | U | | Y | | Y | | Y | | Y | | Y | HIGH |
| Risk | **Low** | | | | **Low** | | **Unclear** | | | | | | | | | **Low** | | | | |
| Barer 199640 | Response | U | U | U | N | Y | N | Y | | Y | U | | N | | Y | | Y | | U | | Y | LOW |
| Risk | **High** | | | | **High** | | **High** | | | | | | | | | **Low** | | | | |
| Bernal 201998 | Response | Y | Y | Y | Y | Y | Y | N | | Y | Y | | Y | | Y | | U | | Y | | Y | HIGH |
| Risk | **Low** | | | | **Low** | | **Unclear** | | | | | | | | | **Low** | | | | |
| Bezin 201576 | Response | Y | Y | Y | Y | Y | Y | Y | | U | Y | | Y | | Y | | Y | | Y | | Y | HIGH |
| Risk | **Low** | | | | **Low** | | **Low** | | | | | | | | | **Low** | | | | |
| Bork 200722 | Response | Y | Y | Y | Y | Y | Y | U | | U | Y | | Y | | Y | | Y | | Y | | Y | HIGH |
| Risk | **Low** | | | | **Low** | | **Unclear** | | | | | | | | | **Low** | | | | |
| Bosco-Lévy 201977 | Response | Y | Y | Y | Y | Y | Y | Y | | U | Y | | Y | | Y | | Y | | Y | | Y | HIGH |
| Risk | **Low** | | | | **Low** | | **Low** | | | | | | | | | **Low** | | | | |
| Coloma 201323 | Response | Y | Y | Y | N | Y | Y | Y | | U | Y | | Y | | Y | | Y | | Y | | Y | HIGH |
| Risk | **Unclear** | | | | **Low** | | **Low** | | | | | | | | | **Low** | | | | |
| Cook 201341 | Response | U | Y | Y | Y | Y | N | Y | | U | U | | U | | Y | | U | | U | | Y | LOW |
| Risk | **Low** | | | | **High** | | **Unclear** | | | | | | | | | **Unclear** | | | | |
| Dalsgaard 201932 | Response | Y | Y | Ya | Y | Y | Y | Y | | U | Y | | Y | | Y | | U | | Y | | Y | HIGH |
| Risk | **Low** | | | | **Low** | | **Low** | | | | | | | | | **Low** | | | | |
| Davenport 199649 | Response | Y | Y | Y | Y | Y | Y | Y | | Y | N | | U | | U | | Y | | Y | | Y | MEDIUM |
| Risk | **Low** | | | | **Low** | | **High** | | | | | | | | | **Low** | | | | |
| Delekta 201833 | Response | Y | Y | Y | Y | Y | Y | U | | U | Y | | Y | | Y | | Y | | Y | | Y | HIGH |
| Risk | **Low** | | | | **Low** | | **Low** | | | | | | | | | **Low** | | | | |
| Donnan 200350 | Response | Y | Y | Y | Y | Y | Y | Y | | U | Y | | Y | | Y | | Y | | Y | | Y | HIGH |
| Risk | **Low** | | | | **Low** | | **Low** | | | | | | | | | **Low** | | | | |
| Egholm 201634 | Response | Y | Y | Yb | Y | Y | Y | Y | | U | Y | | Y | | Y | | Y | | Y | | Y | HIGH |
| Risk | **Low** | | | | **Low** | | **Low** | | | | | | | | | **Low** | | | | |
| Ekker 201957 | Response | Y | Y | Y | Y | Y | Y | U | | U | U | | U | | Y | | Y | | Y | | Y | MEDIUM |
| Risk | **Low** | | | | **Low** | | **High** | | | | | | | | | **Low** | | | | |
| Ellekjaer 1999102 | Response | Y | Y | Y | Y | Y | Y | Y | | Y | U | | Y | | Y | | Y | | Y | | Y | HIGH |
| Risk | **Low** | | | | **Low** | | **Low** | | | | | | | | | **Low** | | | | |
| Frost 200735 | Response | Y | Y | Yc | Y | Y | Y | U | | U | Y | | N | | Y | | Y | | Y | | Y | MEDIUM |
| Risk | **Low** | | | | **Low** | | **High** | | | | | | | | | **Low** | | | | |
| Gaist 200036 | Response | U | Y | Y | Y | Y | Y | U | | U | Y | | U | | Y | | N | | Y | | Y | MEDIUM |
| Risk | **Low** | | | | **Low** | | **Unclear** | | | | | | | | | **Unclear** | | | | |
| Gaist 201351 | Response | U | Y | Y | Y | Y | Y | Y | | U | U | | Y | | Y | | Y | | Y | | Y | HIGH |
| Risk | **Low** | | | | **Low** | | **Unclear** | | | | | | | | | **Low** | | | | |
| Gini 201697 | Response | Y | U | Y | Y | Y | N | Y | | N | U | | Y | | Y | | U | | Y | | Y | LOW |
| Risk | **Low** | | | | **High** | | **High** | | | | | | | | | **Low** | | | | |
| Giroud 201578 | Response | Y | Y | Y | Y | Y | Y | Y | | U | Y | | U | | Y | | Y | | Y | | Y | HIGH |
| Risk | **Low** | | | | **Low** | | **Unclear** | | | | | | | | | **Low** | | | | |
| Haesebaert 201379 | Response | U | Y | Y | Y | Y | Y | Y | | Y | Y | | U | | Y | | Y | | Y | | Y | HIGH |
| Risk | **Low** | | | | **Low** | | **Low** | | | | | | | | | **Low** | | | | |
| Hammad 200852 | Response | Y | Y | Y | Y | Y | N | Y | | U | U | | Y | | Y | | Y | | Y | | Y | MEDIUM |
| Risk | **Low** | | | | **High** | | **Unclear** | | | | | | | | | **Low** | | | | |
| Hammar 199480 | Response | Y | Y | Y | Y | Y | N | U | U | | | U | | U | | Y | Y | Y | | Y | | LOW |
| Risk | **Low** | | | | **High** | | **High** | | | | | | | | | **Low** | | | | |
| Hammar 200158 | Response | U | U | Y | Y | Y | Y | U | | U | U | | Y | | Y | | U | | Y | | Y | MEDIUM |
| Risk | **Unclear** | | | | **Low** | | **Unclear** | | | | | | | | | **Low** | | | | |
| Heerdink 199859 | Response | Y | Y | Yd | Y | Y | Y | U | | U | Y | | U | | Y | | Y | | U | | Y | HIGH |
| Risk | **Low** | | | | **Low** | | **Unclear** | | | | | | | | | **Low** | | | | |
| Heliövaara 198481 | Response | Y | Y | Y | N | Y | Y | U | | U | Y | | U | | Y | | Y | | U | | Y | MEDIUM |
| Risk | **Unclear** | | | | **Low** | | **Unclear** | | | | | | | | | **Low** | | | | |
| Herrett 201353 | Response | Y | Y | Y | Y | Y | Y | Y | | Y | U | | Y | | Y | | Y | | Y | | Y | HIGH |
| Risk | **Low** | | | | **Low** | | **Low** | | | | | | | | | **Low** | | | | |
| Hjerpe 201082 | Response | Y | Y | Ye | Y | Y | Y | Y | | U | N | | U | | Y | | Y | | U | | Y | MEDIUM |
| Risk | **Low** | | | | **Low** | | **High** | | | | | | | | | **Low** | | | | |
| Holmqvist 201260 | Response | Y | U | Y | Y | Y | Y | U | | U | Y | | U | | Y | | Y | | Y | | Y | HIGH |
| Risk | **Low** | | | | **Low** | | **Unclear** | | | | | | | | | **Low** | | | | |
| Ingelsson 200583 | Response | Y | U | Yf | Y | Y | Y | Y | | U | U | | Y | | Y | | U | | Y | | Y | MEDIUM |
| Risk | **Low** | | | | **Low** | | **Unclear** | | | | | | | | | **Low** | | | | |
| Joensen 200937 | Response | Y | Y | Y | Y | Y | N | U | | U | Y | | Y | | Y | | Y | | Y | | Y | MEDIUM |
| Risk | **Low** | | | | **High** | | **Unclear** | | | | | | | | | **Low** | | | | |
| Joensuu 199284 | Response | Y | Y | Y | U | Y | Y | U | | U | Y | | N | | Y | | Y | | Y | | Y | MEDIUM |
| Risk | **Low** | | | | **Low** | | **High** | | | | | | | | | **Low** | | | | |
| Johnsen 200238 | Response | Y | Y | Y | Y | Y | Y | Y | | U | U | | Y | | Y | | Y | | Y | | Y | HIGH |
| Risk | **Low** | | | | **Low** | | **Unclear** | | | | | | | | | **Low** | | | | |
| Kaspar 201885 | Response | Y | U | Y | Y | Y | Y | U | | U | Y | | U | | Y | | Y | | Y | | Y | HIGH |
| Risk | **Low** | | | | **Low** | | **Unclear** | | | | | | | | | **Low** | | | | |
| Khand 200554 | Response | Y | Y | Y | Y | Y | Y | Y | | U | Y | | Y | | Y | | Y | | Y | | Y | HIGH |
| Risk | **Low** | | | | **Low** | | **Low** | | | | | | | | | **Low** | | | | |
| Kirkman 200955 | Response | Y | Y | Y | Y | Y | Y | N | | U | Y | | Y | | Y | | Y | | Y | | Y | MEDIUM |
| Risk | **Low** | | | | **Low** | | **High** | | | | | | | | | **Low** | | | | |
| Kivimäki 201756 | Response | Y | Y | Y | Y | Y | Y | Y | | U | U | | Y | | Y | | Y | | Y | | Y | HIGH |
| Risk | **Low** | | | | **Low** | | **Unclear** | | | | | | | | | **Low** | | | | |
| Köster 201364 | Response | Y | Y | Y | Y | Y | Y | Y | | Y | U | | Y | | Y | | U | | Y | | Y | HIGH |
| Risk | **Low** | | | | **Low** | | **Low** | | | | | | | | | **Low** | | | | |
| Krarup 200739 | Response | Y | Y | Y | Y | Y | Y | Y | | U | Y | | Y | | Y | | Y | | Y | | Y | HIGH |
| Risk | **Low** | | | | **Low** | | **Low** | | | | | | | | | **Low** | | | | |
| Kümler 200824 | Response | Y | Y | Y | Y | Y | Y | Y | | Y | Y | | Y | | Y | | Y | | Y | | Y | HIGH |
| Risk | **Low** | | | | **Low** | | **Low** | | | | | | | | | **Low** | | | | |
| Leone 200486 | Response | Y | Y | Y | Y | Y | Y | U | | U | Y | | Y | | Y | | Y | | Y | | Y | HIGH |
| Risk | **Low** | | | | **Low** | | **Unclear** | | | | | | | | | **Low** | | | | |
| Leppälä 199972 | Response | Y | Y | Yg | Y | Y | Y | U | | U | Y | | Y | | Y | | U | | Y | | Y | HIGH |
| Risk | **Low** | | | | **Low** | | **Unclear** | | | | | | | | | **Low** | | | | |
| Lindblad 199387 | Response | Y | Y | Y | Y | Y | Y | Y | | U | U | | Y | | Y | | Y | | Y | | Y | HIGH |
| Risk | **Low** | | | | **Low** | | **Unclear** | | | | | | | | | **Low** | | | | |
| Lühdorf 201725 | Response | Y | U | Y | Y | Y | Y | Y | | U | Y | | Y | | Y | | Y | | Y | | Y | HIGH |
| Risk | **Low** | | | | **Low** | | **Low** | | | | | | | | | **Low** | | | | |
| Madsen 199026 | Response | Y | Y | Y | Y | Y | Y | Y | | Y | Y | | Y | | Y | | Y | | Y | | Y | HIGH |
| Risk | **Low** | | | | **Low** | | **Low** | | | | | | | | | **Low** | | | | |
| Madsen 200327 | Response | Y | Y | Y | Y | Y | Y | Y | | U | N | | Y | | Y | | Y | | Y | | Y | MEDIUM |
| Risk | **Low** | | | | **Low** | | **High** | | | | | | | | | **Low** | | | | |
| Mähönen 199799 | Response | Y | Y | Y | Y | Y | Y | Y | Y | | | U | | Y | | Y | Y | U | | Y | | HIGH |
| Risk | **Low** | | | | **Low** | | **Low** | | | | | | | | | **Low** | | | | |
| Mähönen 201367 | Response | Y | Y | Y | Y | Y | Y | Y | | Y | Y | | Y | | Y | | Y | | Y | | Y | HIGH |
| Risk | **Low** | | | | **Low** | | **Low** | | | | | | | | | **Low** | | | | |
| Mard 201028 | Response | Y | U | Y | Y | Y | Y | Y | | U | Y | | Y | | Y | | Y | | Y | | Y | HIGH |
| Risk | **Low** | | | | **Low** | | **Low** | | | | | | | | | **Low** | | | | |
| McAlpine 199842 | Response | Y | U | Yh | Y | Y | Y | Y | | Y | Y | | Y | | Y | | Y | | Y | | Y | HIGH |
| Risk | **Low** | | | | **Low** | | **Low** | | | | | | | | | **Low** | | | | |
| Merry 200965 | Response | Y | Y | Y | Y | Y | Y | Y | | Y | Y | | Y | | Y | | Y | | Y | | Y | HIGH |
| Risk | **Low** | | | | **Low** | | **Low** | | | | | | | | | **Low** | | | | |
| Nieuwkamp 201461 | Response | Y | Y | Y | Y | Y | Y | U | | U | U | | N | | Y | | Y | | Y | | Y | MEDIUM |
| Risk | **Low** | | | | **Low** | | **High** | | | | | | | | | **Low** | | | | |
| Nilsson 199488 | Response | Y | Y | U | Y | Y | Y | Y | | U | Y | | U | | Y | | Y | | Y | | Y | HIGH |
| Risk | **Low** | | | | **Low** | | **Unclear** | | | | | | | | | **Low** | | | | |
| Øie 201889 | Response | Y | Y | Y | Y | Y | Y | Y | | U | Y | | U | | Y | | Y | | Y | | Y | HIGH |
| Risk | **Low** | | | | **Low** | | **Unclear** | | | | | | | | | **Low** | | | | |
| Pajunen 200568 | Response | Y | Y | Y | Y | Y | Y | Y | | Y | U | | Y | | Y | | Y | | U | | Y | HIGH |
| Risk | **Low** | | | | **Low** | | **Low** | | | | | | | | | **Low** | | | | |
| Palomäki 1994100 | Response | Y | Y | Y | Y | Y | Y | Y | | Y | N | | Y | | Y | | Y | | U | | Y | HIGH |
| Risk | **Low** | | | | **Low** | | **Unclear** | | | | | | | | | **Low** | | | | |
| Pfister 201343 | Response | Y | Y | Y | Y | Y | Y | Y | | U | Y | | Y | | Y | | Y | | Y | | Y | HIGH |
| Risk | **Low** | | | | **Low** | | **Low** | | | | | | | | | **Low** | | | | |
| Pietilä 199769 | Response | Y | Y | Yi | Y | Y | Y | Y | | Y | Y | | Y | | Y | | Y | | Y | | Y | HIGH |
| Risk | **Low** | | | | **Low** | | **Low** | | | | | | | | | **Low** | | | | |
| Rapola 199770 | Response | Y | Y | Yg | Y | Y | Y | U | | U | Y | | U | | Y | | Y | | Y | | Y | HIGH |
| Risk | **Low** | | | | **Low** | | **Unclear** | | | | | | | | | **Low** | | | | |
| Rinaldi 200390 | Response | Y | Y | Y | Y | Y | Y | Y | | U | Y | | Y | | Y | | Y | | Y | | Y | HIGH |
| Risk | **Low** | | | | **Low** | | **Low** | | | | | | | | | **Low** | | | | |
| Rodrigo-Rincon 201591 | Response | U | U | U | N | Y | Y | Y | | U | Y | | N | | Y | | Y | | U | | Y | LOW |
| Risk | **High** | | | | **Low** | | **High** | | | | | | | | | **Low** | | | | |
| Ruigómez 201044 | Response | Y | U | Y | Y | Y | Y | Y | | U | U | | Y | | Y | | Y | | Y | | Y | HIGH |
| Risk | **Low** | | | | **Low** | | **Unclear** | | | | | | | | | **Low** | | | | |
| Sansom 201545 | Response | Y | Y | Y | Y | Y | N | U | | U | Y | | N | | Y | | Y | | Y | | Y | LOW |
| Risk | **Low** | | | | **High** | | **High** | | | | | | | | | **Low** | | | | |
| Sedova 201592 | Response | Y | Y | Y | Y | Y | Y | Y | | N | Y | | Y | | Y | | Y | | Y | | Y | HIGH |
| Risk | **Low** | | | | **Low** | | **Unclear** | | | | | | | | | **Low** | | | | |
| Spolaore 200593 | Response | Y | Y | Y | Y | Y | Y | Y | | U | Y | | Y | | Y | | Y | | Y | | Y | HIGH |
| Risk | **Low** | | | | **Low** | | **Low** | | | | | | | | | **Low** | | | | |
| Stegmayr 199266 | Response | Y | Y | Y | Y | U | N | Y | | Y | U | | Y | | Y | | Y | | Y | | Y | MEDIUM |
| Risk | **Low** | | | | **High** | | **Low** | | | | | | | | | **Low** | | | | |
| Sundbøll 201629 | Response | Y | Y | Y | Y | Y | Y | U | | U | Y | | U | | Y | | Y | | Y | | Y | HIGH |
| Risk | **Low** | | | | **Low** | | **Unclear** | | | | | | | | | **Low** | | | | |
| Thygesen 201130 | Response | Y | Y | Y | Y | Y | Y | Y | | N | Y | | U | | Y | | Y | | Y | | Y | MEDIUM |
| Risk | **Low** | | | | **Low** | | **High** | | | | | | | | | **Low** | | | | |
| Tolonen 200773 | Response | Y | Y | Y | Y | Y | Y | Y | | Y | Y | | Y | | Y | | Y | | Y | | Y | HIGH |
| Risk | **Low** | | | | **Low** | | **Low** | | | | | | | | | **Low** | | | | |
| Valk 201694 | Response | Y | Y | Y | Y | Y | Y | Y | | U | Y | | Y | | Y | | Y | | Y | | Y | HIGH |
| Risk | **Low** | | | | **Low** | | **Low** | | | | | | | | | **Low** | | | | |
| Van Doorn 201795 | Response | Y | U | Yc | Y | Y | Y | Y | | U | Y | | N | | Y | | Y | | Y | | Y | MEDIUM |
| Risk | **Low** | | | | **Low** | | **High** | | | | | | | | | **Low** | | | | |
| Van Staa 199446 | Response | Y | Y | Y j | Y | Y | N | Y | | U | Y | | Y | | Y | | Y | | Y | | Y | MEDIUM |
| Risk | **Low** | | | | **High** | | **Low** | | | | | | | | | **Low** | | | | |
| Varmdal 201663 | Response | Y | Y | Y | Y | Y | Y | Y | | Y | Y | | Y | | Y | | Y | | Y | | Y | HIGH |
| Risk | **Low** | | | | **Low** | | **Low** | | | | | | | | | **Low** | | | | |
| Verdú-Rotellar 201796 | Response | Y | Y | Y | Y | Y | Y | Y | | U | Y | | Y | | Y | | Y | | Y | | Y | HIGH |
| Risk | **Low** | | | | **Low** | | **Low** | | | | | | | | | **Low** | | | | |
| Vila-Corcoles 201462 | Response | Y | Y | Y | Y | Y | Y | Y | | U | Y | | Y | | Y | | U | | Y | | Y | HIGH |
| Risk | **Low** | | | | **Low** | | **Low** | | | | | | | | | **Low** | | | | |
| Wildenschild 201431 | Response | Y | Y | Y | Y | Y | Y | Y | | U | Y | | Y | | Y | | Y | | Y | | Y | HIGH |
| Risk | **Low** | | | | **Low** | | **Low** | | | | | | | | | **Low** | | | | |
| Wright 201247 | Response | Y | Y | Yk | Y | Y | Y | Y | | N | Y | | Y | | Y | | Y | | Y | | Y | HIGH |
| Risk | **Low** | | | | **Low** | | **Unclear** | | | | | | | | | **Low** | | | | |
| Zhou 201448 | Response | Y | Y | Y | Y | Y | N | U | | U | U | | N | | Y | | U | | U | | Y | LOW |
| Risk | **Low** | | | | **High** | | **High** | | | | | | | | | **Unclear** | | | | |

a generalisable to diabetics; b generalisable to patients treated with PCI; c generalisable to patients with AF; d generalisable to patients ≥55 years treated with diuretics & NSAIDs; e generalisable to patients treated with a CVD drug; f generalisable to men aged 50 in 1970-74 with HF when aged 52- 90; g generalisable to men who smoke 5+ cigarettes a day; h generalisable to women without hysterectomy, pre-menopausal and have not had breast or ovarian cancer; i generalisable to men; j generalisable to patients treated with sulphonylurea medication; k generalisable to women

# **S4 Table. Assessment of quality of evidence for outcomesa**

| Number of studies**b** | Design | Risk of bias | Inconsistency | Imprecision | Any reason to upgrade | Quality |
| --- | --- | --- | --- | --- | --- | --- |
| **Sensitivity of HF diagnoses in secondary care EHRs** | | | | | | |
| 6 | 6 validation studies | not serious | very serious**c** | likely serious**d** | none | ⨁◯◯◯  very low |
| **PPV of HF diagnoses in secondary care EHRs** | | | | | | |
| 14 | 13 validation studies, 1 non-validation study | not serious | Serious**e** | serious | none | ⨁◯◯◯  very low |
| **PPV of HF diagnoses in primary care EHRs** | | | | | | |
| 5 | 5 validation studies | serious | very serious | not serious | none | ⨁◯◯◯  very low |
| **Sensitivity of MI diagnoses in secondary care EHRs** | | | | | | |
| 10 | 9 validation studies, 1 non-validation study | not serious | very serious**f** | not serious | none | ⨁⨁◯◯  low |
| **PPV of MI diagnoses in secondary care EHRs** | | | | | | |
| 23 | 22 validation studies, 1 non-validation study | not serious | very serious**g** | not serious | none | ⨁⨁◯◯  low |
| **PPV of MI diagnoses in primary care EHRs** | | | | | | |
| 5 | 5 validation studies | not serious | Serious**h** | not serious | none | ⨁⨁⨁◯  moderate |
| **Sensitivity of stroke diagnoses in secondary care EHRs** | | | | | | |
| 15 | 15 validation studies | not serious | very serious**i** | serious | none | ⨁◯◯◯  very low |
| **PPV of stroke diagnoses in secondary care EHRs** | | | | | | |
| 25 | 23 validation studies, 2 non-validation studies | not serious | Serious**j** | not serious | none | ⨁⨁⨁◯  moderate |
| **PPV of stroke diagnoses in primary care EHRs** | | | | | | |
| 3 | 1 validation study, 2 non-validation studies | serious | serious, likely very serious**k** | not serious | none | ⨁◯◯◯  very low |

a publication bias could not be assessed due to the low number of studies which included the measures of sensitivity and specificity required for assessment and indirectness was not be assessed as this is not relevant to cross-study quality for validation studies; b only studies which reported a main result were included; c heterogeneity assessed in 5 studies with raw data; d confidence intervals only available for 1 study, which were wide; e heterogeneity assessed in 11 with raw data; f heterogeneity assessed in 4 studies with raw data; g heterogeneity assessed in 18 studies with raw data, confidence intervals available for 22 studies; h confidence intervals available for 4 studies; h heterogeneity assessed in 10 studies with raw data, confidence intervals available for 14 studies; i heterogeneity assessed in 18 studies with raw data; heterogeneity undetermined as raw data only available for 1 study

# **S1 Fig. Positive predictive value for ischaemic stroke diagnoses recorded in secondary care EHRs from studies which reported the number of records confirmed positive and the total number of records**


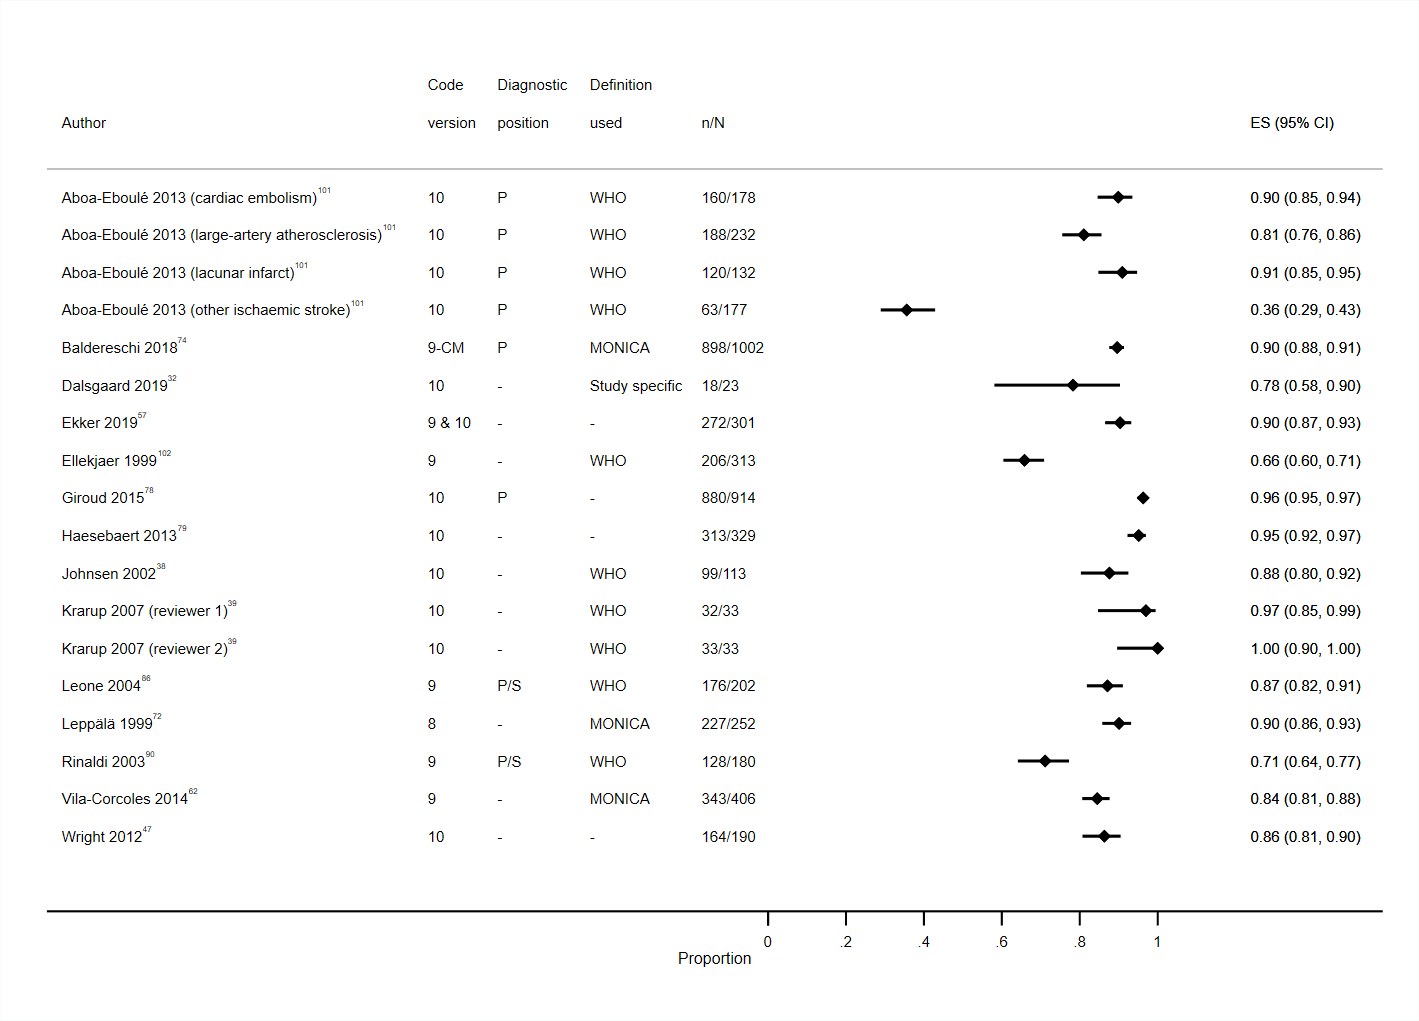


ES, effect size; P, primary; P/S, primary or secondary.

# **S2 Fig. Positive predictive value for intracerebral haemorrhage diagnoses recorded in secondary care EHRs from studies which reported the number of records confirmed positive and the total number of records**


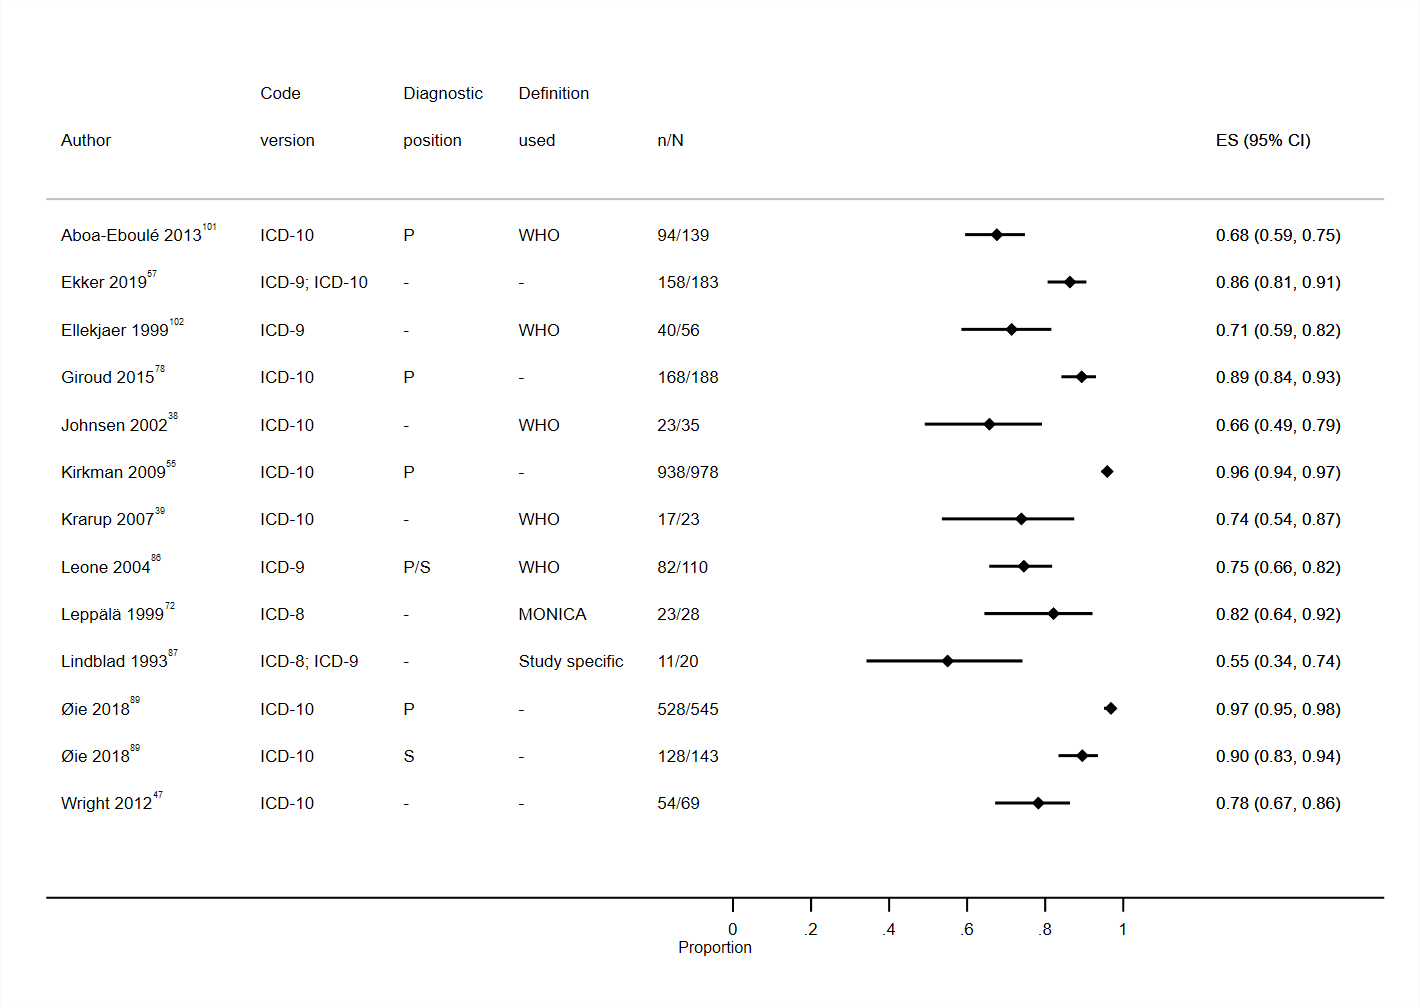


ES, effect size; P, primary; P/S, primary or secondary.

# **S3 Fig. Positive predictive value for subarachnoid haemorrhage diagnoses recorded in secondary care EHRs from studies which reported the number of records confirmed positive and the total number of records**


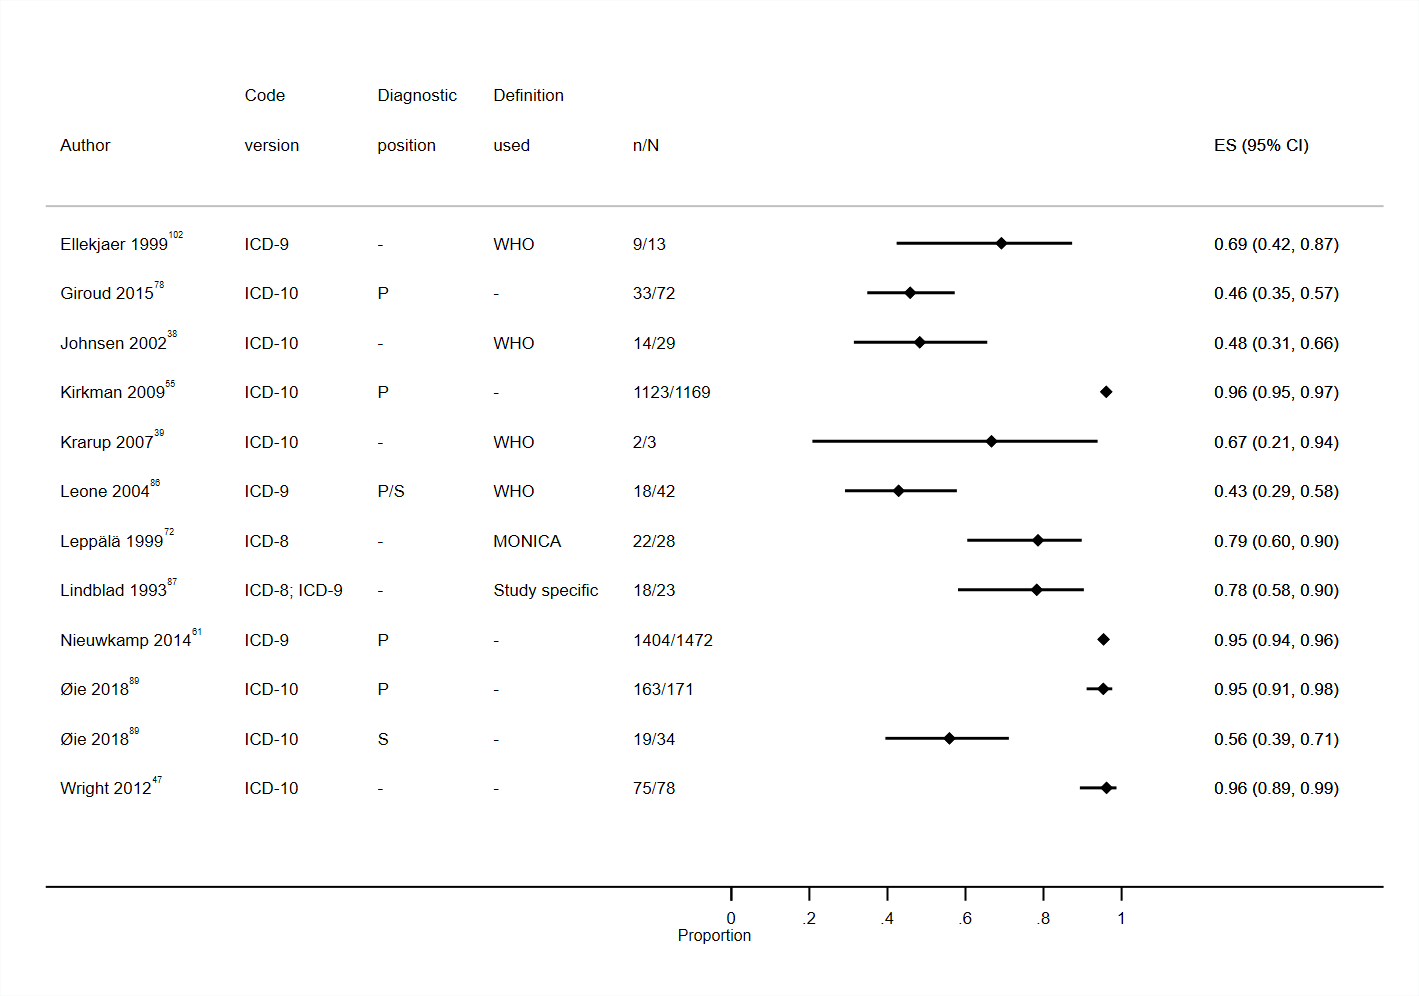


ES, effect size; P, primary; P/S, primary or secondary.

# **S4 Fig. Sensitivity for ischaemic stroke diagnoses recorded in secondary care EHRs from studies which reported the number of records confirmed positive and the total number of records**


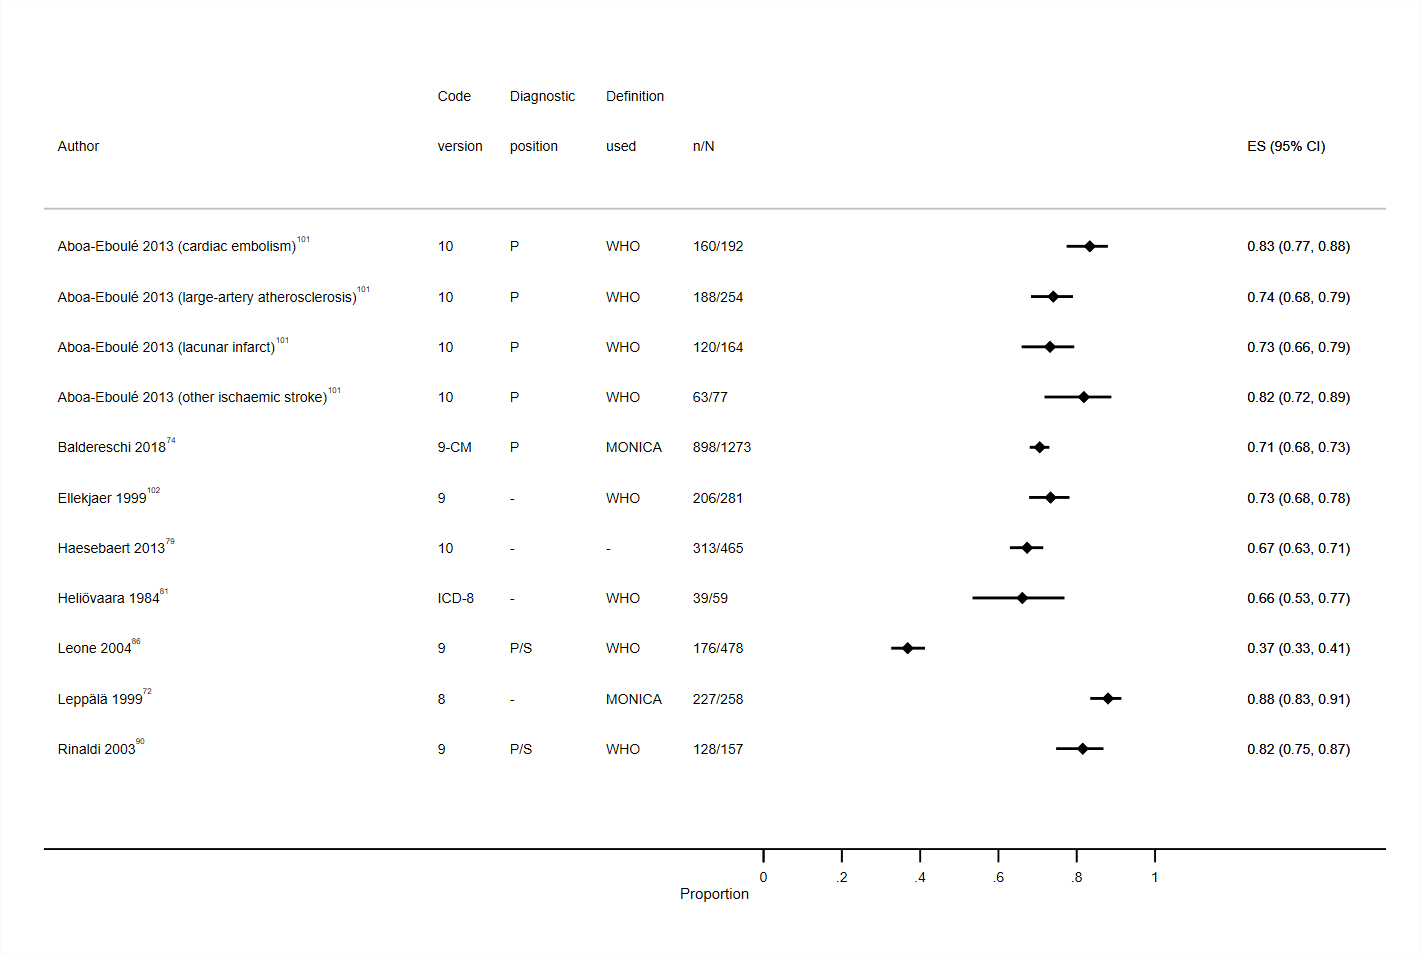


ES, effect size; P, primary; P/S, primary or secondary.

# **S5 Fig. Sensitivity for intracerebral haemorrhage diagnoses recorded in secondary care EHRs from studies which reported the number of records confirmed positive and the total number of records**


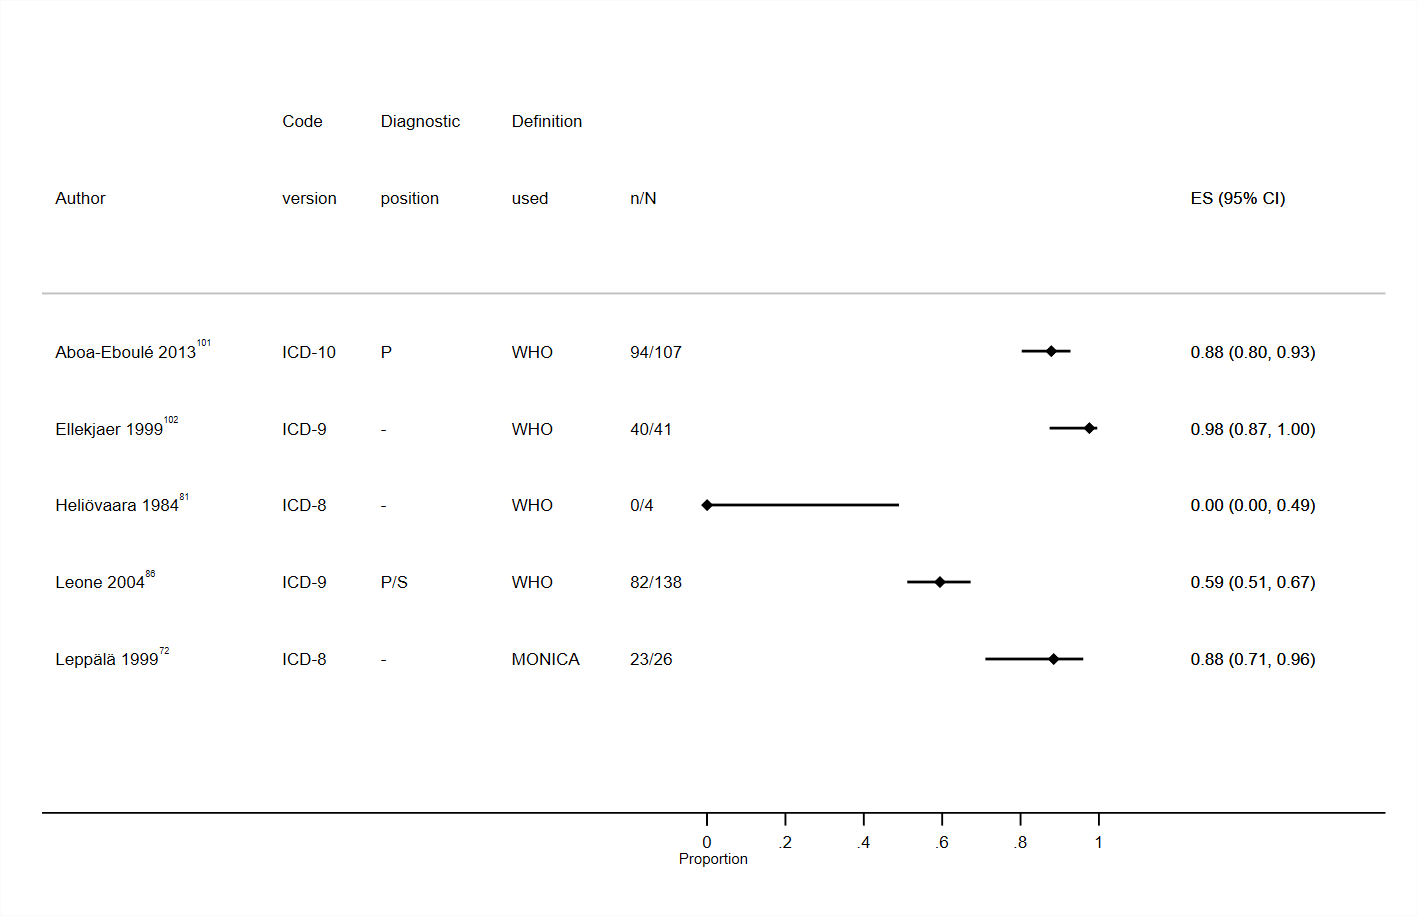


ES, effect size; P, primary; P/S, primary or secondary.

# **S6 Fig. Sensitivity for subarachnoid haemorrhage diagnoses recorded in secondary care EHRs from studies which reported the number of records confirmed positive and the total number of records**


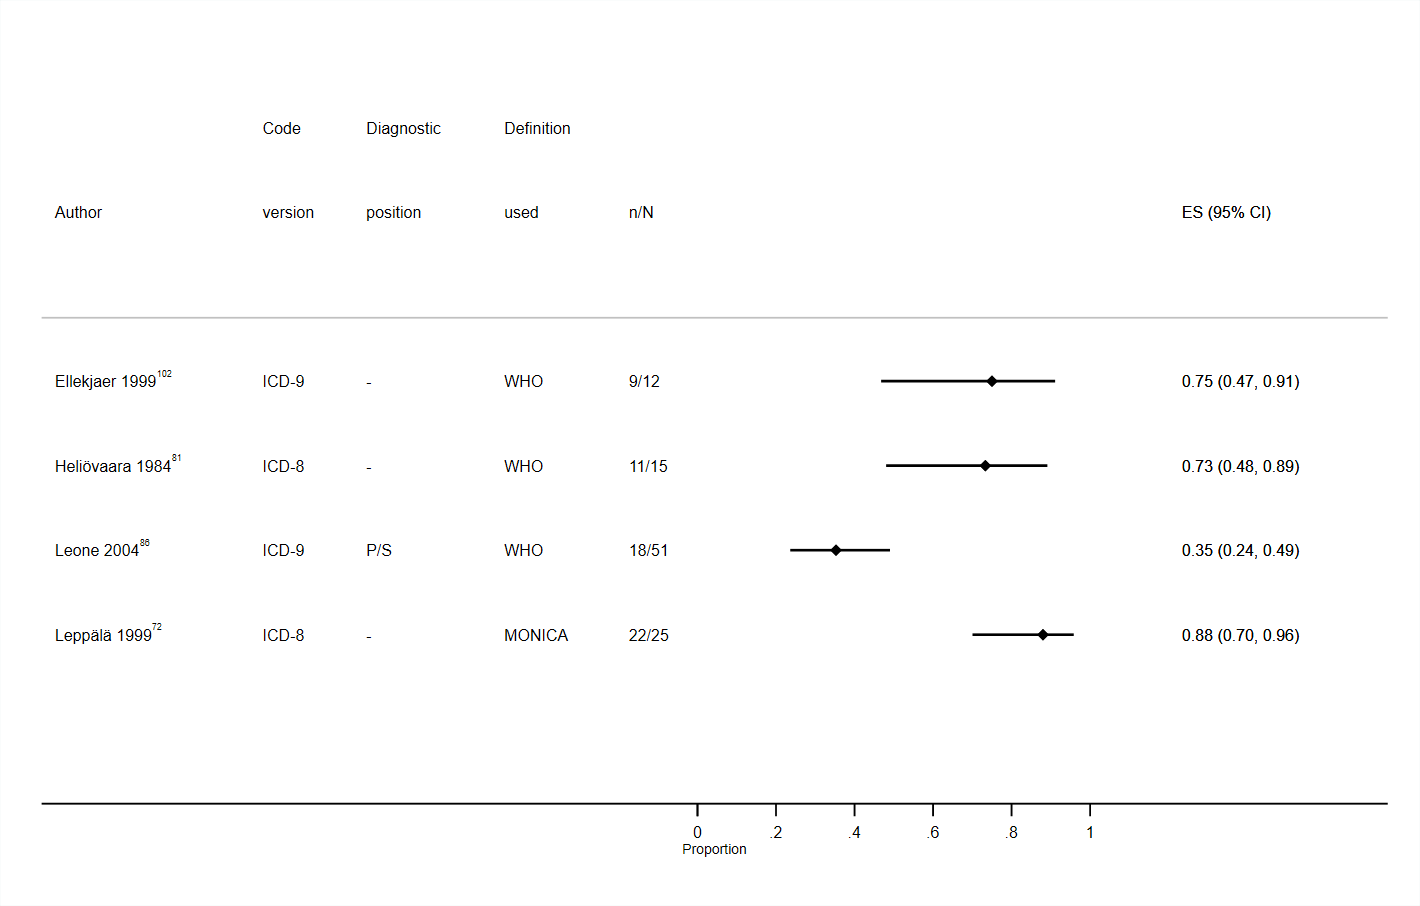


ES, effect size; P, primary; P/S, primary or secondary.
